Table S1: Ig gene analysis and antibody reactivity of HCV E2 peptide (aa483-499)-binding memory B cells from patient SR-1.

| IG    | HEAVY CHAIN    |                |                |                            |                     |                | LIGHT CHAIN    |               |                     |     | REACTIVITY |         |  |
|-------|----------------|----------------|----------------|----------------------------|---------------------|----------------|----------------|---------------|---------------------|-----|------------|---------|--|
| SR-1  | V <sub>H</sub> | D              | J <sub>H</sub> | IgH-CDR3 (aa)              | V <sub>H</sub> -Mut | V <sub>K</sub> | J <sub>K</sub> | Igk-CDR3 (aa) | V <sub>K</sub> -Mut | LPS | dsDNA      | Insulin |  |
| C-029 | 3-74           | 5-5/18         | 2              | ARGYGEYVYFDL               | 6                   | 1-27           | 4              | QKYDSAPFT     | 2                   |     |            |         |  |
| C-041 | 1-18           | 6-19           | 6              | ARRAGWPDYVGMVD             | 5                   | 1-5            | 4              | QQFNITYS      | 3                   |     |            |         |  |
| C-051 | 4-59           | 2-8            | 6              | ARHVPHYCNSGVCSAFGMVDV      | 11                  | 1-39           | nd             | nd            | nd                  |     |            |         |  |
| C-055 | 5-51           | 2-21/6-6       | 4              | ARPMVAASAPGY               | 4                   | 3-20           | 1              | LOYGSSPPWT    | nd                  |     |            |         |  |
| C-086 | 3-64           | 3-3            | 3              | AREGCTYDWSWGYGEDTFDI       | 9                   | 3-20           | 2              | QOYGNAPMAMT   | 4                   |     |            |         |  |
| C-116 | 4-59           | 1-7/3-10/3-9   | 4/5/6          | GRLRVDDLWFFPY              | nd                  | 1-5            | 1              | HRYNSHRT      | nd                  |     |            |         |  |
| C-118 | 1-46           | 3-10           | 5              | ARAGSNWFDP                 | 9                   | 1-39           | 1              | QQTNYIPWIT    | 4                   | R   | R          | R       |  |
| C-132 | 1-18           | 6-19           | 6              | ARPLEASGWYPPPGMVDV         | 10                  | 3-15           | 2              | QOYDNWPSYT    | 4                   | R   | R          | R       |  |
| C-140 | 3-23           | 3-10/6-13      | 4              | AENGSTSLAGIVY              | 9                   | 2-28           | 4              | MQALTRPPT     | 2                   |     |            |         |  |
| C-152 | 4-34           | 3-3/3-9        | 4/5/6          | AASRGYAAWQV                | 6                   | 1-39           | 1              | QOSYTPRT      | 0                   | NR  | NR         | NR      |  |
| C-175 | 4-34           | 1-26/6-19/3-3  | 4              | ARLRTAFSRSGFSYFRGNNLFD     | 3                   | 3-15           | 4              | QOYNWPPPLT    | 3                   | NR  | R          | R       |  |
| C-188 | 3-33           | 3-1            | 2              | ARAQLAVGLWFFDL             | 9                   | 2-40           | 4              | MQHIOFPF      | nd                  |     |            |         |  |
| C-206 | 1-69           | 3-3            | 6              | ARVANKFFGVAQNYFFVHMDV      | 5                   | 2-28           | 5              | MQALQTLPT     | 2                   |     |            |         |  |
| C-207 | 3-15           | 3-16           | 4              | TTRLRVVDTRPDY              | 7                   | 1-27           | 3              | QKYDSVPFT     | 5                   |     |            |         |  |
| C-214 | 3-15           | 3-16           | 4              | TTLRPSDY                   | 6                   | 3-11           | 2              | QORSNLGY      | 4                   | NR  | NR         | R       |  |
| C-216 | 4-34           | 3-22           | 4              | ARGLDTSGYYPDFDS            | 5                   | 3-11           | 4              | QERNWWRVT     | 0                   |     |            |         |  |
| C-226 | 4-38-2         | 4-11/4-4       | 5              | ARVGSNYYGGWFDP             | 8                   | 1-39           | 4              | QQTSSPLT      | 8                   | NR  | NR         | NR      |  |
| C-228 | 4-34           | 3-22           | 5              | ARGRVVRWLLRQWFPD           | 3                   | 3-15           | 1              | QOYYSSPPT     | 4                   | NR  | R          | R       |  |
| C-229 | 3-7            | 3-10/3-16      | 4/5            | TSSGAGSTFAF                | 11                  | 1-8            | 1              | QOYYNVPWT     | 5                   |     |            |         |  |
| C-230 | 3-33           | 3-3/3-9        | 6              | ARELTPVYGLAWGPKNTRLTYGMVDV | 9                   | 3-11           | 4              | QORRSWPLT     | 5                   | NR  | NR         | NR      |  |
| C-237 | 4-39           | 1-7            | 5              | ARHSNPNYNWYVWFPD           | nd                  | 1-39           | 1              | QOSYTPPA      | 2                   | NR  | NR         | NR      |  |
| C-241 | 1-3            | 1-20/1-1       | 4              | ARDPNWVKGEFDY              | 9                   | 1-5            | 2              | QOYESVPCD     | 4                   |     |            |         |  |
| C-244 | 4-31           | 3-3/2-15/2-21  | 4              | ARAIGNHFFDS                | nd                  | 3-15           | 4              | QOYNWPPPLT    | 3                   |     |            |         |  |
| C-248 | 3-30           | 2-15           | 6              | ARSDYCSGEAARSPLYAMVDV      | 12                  | 1D-33          | 4              | QOYENLPLT     | 4                   |     |            |         |  |
| C-249 | 5-51           | 3-22           | 6              | ARSLYYDSSGYRGLDV           | 6                   | 3-11           | 3              | QORSNWPLFT    | 1                   |     |            |         |  |
| C-252 | 3-33           | 6-19           | 5              | ARDAVYTSIGWFRWVFPD         | 4                   | 1-12           | 4              | QOQHIFPLT     | 2                   | R   | R          | R       |  |
| C-253 | 4-38-2         | 5-5/18         | 3              | VGSGYTYGDHYFDM             | 6                   | 2D-40          | 4              | MORLQFPRT     | 2                   |     |            |         |  |
| C-254 | 1-3            | 3-9            | 4/5            | nd                         | nd                  | 1-5            | 1              | LHYNYSYGT     | 3                   |     |            |         |  |
| C-259 | 4-59           | 3-16/5-12/3-3  | 5              | AREGHMLRPYDSWGGWFDP        | 10                  | 1-5            | 2              | QOYNSFSPT     | 7                   | R   | R          | R       |  |
| C-260 | 4-59           | 2-2            | 6              | ARVDCSSSCYWAPLGMNV         | 2                   | 1-39           | 4              | QOSYSTPLTFTG  | 0                   |     |            |         |  |
| C-263 | 3-48           | 1-7/1-20       | 6              | RRATLSLNOYGMVDV            | nd                  | 2-28           | 1              | MQALHTPPWT    | 2                   |     |            |         |  |
| C-265 | 3-23           | 1-26           | 3              | AKDWASGSYFADFND            | 5                   | 3-NL4          | 4              | QORSSL        | nd                  |     |            |         |  |
| C-266 | 3-74           | 2-2            | 4              | VRESSDEYNTRTFFDS           | 9                   | 4-1            | 2              | QOYYTPRT      | 5                   |     |            |         |  |
| C-267 | 3-15           | 5-24           | 6              | STADDSRWSLVY               | 14                  | 4-1            | 2              | HOYYPFMFMA    | 7                   | NR  | NR         | NR      |  |
| C-268 | 1-69           | 3-16           | 4              | ANIDGRVPCFLFDN             | 15                  | 3-15           | 1              | QOYNWPT       | 3                   |     |            |         |  |
| C-272 | 4-34           | 6-19           | 5              | AKHPPTYSGRRRNMVVDL         | 9                   | 1-12           | nd             | nd            | nd                  |     |            |         |  |
| C-276 | 4-59           | 3-22           | 4              | ARGEYVYDGNSTDMRYLDY        | nd                  | 1-39           | 1              | EQSYTTPWT     | 10                  |     |            |         |  |
| C-281 | 4-59           | 1-26/3-3       | 4              | ARHLWEFGPFDY               | 10                  | 1-12           | 4              | QOAGDFPLT     | 4                   |     |            |         |  |
| C-283 | 4-59           | 6-19/6-6/25    | 5              | AVGYSRWIDS                 | 10                  | 3-15           | 2              | QOYNNVLYT     | 1                   | NR  | NR         | NR      |  |
| C-287 | 3-73           | 2-2/3-3        | 6              | TRSRGGMVDV                 | 10                  | 1-39           | 5              | QOSLITPFT     | 7                   |     |            |         |  |
| C-291 | 3-15           | 3-22           | 4/5            | TTWPGSIRWVGH               | nd                  | 1-5            | 1              | QOYNSWY       | 1                   |     |            |         |  |
| C-302 | 3-43D          | 6-19           | 4              | GKDVGTSAIAGTIDF            | 12                  | 3-11           | 1              | QOHSNWRPT     | 2                   |     |            |         |  |
| C-303 | 1-46           | 2-15           | 4              | AREEVFGCSGSCYEDY           | 9                   | 3-20           | 4              | QOYGISPLT     | 3                   | R   | R          | R       |  |
| C-307 | 3-15           | 6-19/6-6/25    | 2              | STRNATREYVYVYGMVDV         | 2                   | 1-39           | 2              | QOSYSTPH      | 3                   | R   | R          | R       |  |
| C-311 | 4-4            | 2-15/3-16      | 6              | AREKRLGQYYNSGMVDV          | nd                  | 3-20           | 2              | QOYSSPPYT     | 2                   |     |            |         |  |
| C-315 | 3-53           | 4-17/4-23      | 3              | AKNDYGVKGIWAFDM            | 10                  | 2-28           | 3              | MOGLQTT       | 5                   |     |            |         |  |
| C-317 | 4-59           | 2-8            | 5              | ARHVSARWVFDH               | 5                   | 3-20           | 5              | QOYNSPPIT     | 6                   | R   | R          | R       |  |
| C-326 | 4-39           | 6-19           | 4              | ATSPGTVH                   | nd                  | 2-28           | 3              | MHALQPT       | nd                  |     |            |         |  |
| C-328 | 3-20           | 2-2/2-15       | 4              | ARVLEDSNCDY                | 6                   | 4-1            | 2              | QOYYSPYT      | 2                   |     |            |         |  |
| C-330 | 3-15           | 3-16           | 4              | TTDGGAGEFARSFDH            | nd                  | 4-1            | 1              | QOYITPRT      | 4                   |     |            |         |  |
| C-411 | 3-30           | 5-12           | 6              | AKDDTRWFSGIVGGVYHGMVDV     | 6                   | 1-5            | 1              | QOYNSWY       | 6                   | R   | R          | R       |  |
| C-417 | 3-7            | 3-10/3-16      | 6              | ARWEEPSTYSMFYHYGLDV        | 5                   | 1-9            | 1              | QQLNYPRT      | 2                   |     |            |         |  |
| C-422 | 1-46           | 2-21           | 2              | ARGFCGGDCYSDWYFDS          | 8                   | 3-20           | 4              | QOYGSLLT      | 3                   | NR  | NR         | NR      |  |
| C-427 | 3-48           | 2-21           | 3              | VVGATGGIAY                 | 6                   | 1D-33          | 4              | QOYDNLPPIT    | 2                   |     |            |         |  |
| C-428 | 3-33           | 3-3/3-9        | 4              | ARGPFAEGHYLDY              | 9                   | 4-1            | 4              | QOYYSFPLT     | 6                   |     |            |         |  |
| C-430 | 1-18           | 3-10           | 4              | ARESWFDDRKLDDH             | 7                   | 1-5            | 4              | QOYNSVLT      | 3                   |     |            |         |  |
| C-432 | 3-53           | 3-10           | 3              | ARDQGLDF                   | 3                   | 3-15           | 4              | QOYNWPPKLT    | 1                   |     |            |         |  |
| C-433 | 4-61           | 6-19           | 4              | ARDLGGNSGWNOSYFDY          | nd                  | 3-20           | 4              | QOYSSPFT      | 1                   |     |            |         |  |
| C-435 | 3-30           | 2-15           | 6              | ARDWLGYSGDCTCSYNGMVDV      | 9                   | 1-39           | 2              | QOQSTPHT      | 5                   |     |            |         |  |
| C-436 | 4-61           | 7-27           | 4              | ARKKVALVGTDFY              | nd                  | 2D-30          | 3              | MODTHNPI      | 4                   |     |            |         |  |
| C-438 | 4-31           | 3-16/5-5       | 6              | ARGWGSYDSGSYGLDV           | nd                  | 3-20           | 2              | QOYSSPFT      | 3                   |     |            |         |  |
| C-439 | 3-11           | 3-3            | 2              | ARETTYDFGTWVHFDV           | 10                  | 1-16           | 4              | QOYNSVPPFS    | 1                   |     |            |         |  |
| C-441 | 4-38-2         | 3-3            | 4              | ARGGGDFWGSYSHYFFD          | 3                   | 1-39           | 5              | QOSYTPPIT     | 2                   |     |            |         |  |
| C-443 | 4-59           | 2-2/3-10       | 6              | ASLPRSSAWNYHGDV            | 7                   | 1-17           | 2              | LOHNSPYT      | 4                   |     |            |         |  |
| C-447 | 3-7            | 6-19/6-13      | 5              | ARDARRSPWYVFPD             | 7                   | 2D-29          | 1/4            | MQSIGSLFEA    | nd                  |     |            |         |  |
| C-455 | 3-30           | 3-16           | 6              | ARDKEGEDYFYGMVDV           | 4                   | 4-1            | 4              | QOYSLPH       | nd                  | NR  | NR         | NR      |  |
| C-458 | 1-69           | 6-6            | 6              | AVWAYHYGMVDV               | 5                   | 1-9            | 4              | QGRSARTRK     | nd                  |     |            |         |  |
| C-463 | 3-7            | 3-22           | 4/5            | GREGFKDHYDSMGYYITQ         | 4                   | 3-11           | 1              | QORSRVPVPT    | nd                  |     |            |         |  |
| C-472 | 3-30           | 3-22           | 4              | AKDRGPPYDFSTSYHPSDY        | 7                   | 1-9            | 3              | QLLNIYPPT     | 4                   |     |            |         |  |
| C-473 | 3-30           | 3-3/3-22       | 4/5            | AVWGGYSIGFG                | 11                  | 2-30           | 1              | PRDQEI        | 4                   |     |            |         |  |
| C-481 | 3-30-3         | 4-17           | 4              | ARGAIDVYASWRSYFDY          | 11                  | 3-20           | 1              | QHVSPIPT      | nd                  |     |            |         |  |
| C-486 | 4-34           | 6-13           | 1              | ARRHSTSWYNLGMVFOE          | nd                  | 4-1            | 1              | QOYFNPWT      | 8                   |     |            |         |  |
| C-489 | 1-18           | 3-22           | 6              | ARDSFYDRSYNAYYGMVDV        | nd                  | 2-24           | 1              | MOATQFPRT     | 1                   |     |            |         |  |
| C-490 | 3-33           | 6-19/6-6/25    | 4/5            | TRDSOYSRSQTPFRY            | 4                   | 4-1            | 2              | QOYYGPPYT     | 2                   |     |            |         |  |
| C-492 | 3-30           | 2-21/3-10/3-16 | 4              | AKDLFYGGGEVFDY             | 9                   | 3-11           | 4              | QOYWIPLT      | 4                   |     |            |         |  |
| SR-1  | V <sub>H</sub> | D              | J <sub>H</sub> | IgH-CDR3 (aa)              | V <sub>H</sub> -Mut | V <sub>L</sub> | J <sub>L</sub> | Igk-CDR3 (aa) | V <sub>L</sub> -Mut | LPS | dsDNA      | Insulin |  |
| C-005 | 1-3            | 3-10           | 6              | ARDGGAMVRGLPYHYGMVDV       | 1                   | 1-36           | 3              | AAWDDSLNGWV   | 1                   |     |            |         |  |
| C-007 | 1-69           | 2-2            | 6              | ARDRYCSGTTCQNYHYNYMVDV     | 2                   | 3-21           | 2/3            | AWDTSDDHPV    | 2                   |     |            |         |  |
| C-040 | 1-46           | 1-26           | 3              | ARERGSYVGRAPGI             | 9                   | 1-51           | 3              | GTWDNSLSAPWV  | 5                   |     |            |         |  |
| C-063 | 3-33           | 1-20/1-1       | 6              | AGOGSGTATFYFHGIDV          | 9                   | 1-51           | 2/3            | GTWDSSRAVAV   | nd                  |     |            |         |  |
| C-071 | 3-33           | 1-7/3-16/3-3   | 6              | ARELLRDGMVDV               | 8                   | 1-51           | 2/3            | GTSDNSRRSVI   | nd                  |     |            |         |  |
| C-090 | 4-5            | 2-8            | 5              | ARVNIWGNWVFPD              | 6                   | 1-47           | 2/3            | ATWDSGSVGV    | 4                   | R   | R          | R       |  |
| C-119 | 3-30           | 3-10           | 6              | ANYYYYYGMDV                | 1                   | 2-11           | 1              | CSYAGSYV      | 0                   | R   | R          | R       |  |
| C-209 | 4-39           | 3-10           | 6              | VRHNEWRGTAGTFYHYAMVDV      | nd                  | 2-14           | 2/3            | TSYTTDSTL     | 7                   |     |            |         |  |
| C-227 | 1-69           | 3-9/3-10       | 4              | ARNKPTTFDTIGSYHFDV         | 6                   | 2-23           | 3              | CSYAGSNWV     | 2                   | NR  | NR         | NR      |  |
| C-231 | 3-48           | 3-3            | 6              | ARDNPVGYDFWVMDV            | 5                   | 1-44           | 3              | ASWDDSLNGV    | 2                   |     |            |         |  |
| C-235 | 3-33           | 3-3            | 6              | ARDRLALRLEWFRVFMVDV        | 2                   | 6-57           | 2/3            | QSYDSSYHHV    | nd                  |     |            |         |  |
| C-246 | 4-59           | 5-24           | 6              | ARHLPFRNYYFYGMVDV          | 9                   | 7-43           | 2/3            | LHYGGAQLV     | 2                   |     |            |         |  |
| C-251 | 5-51           | 2-2            | 4              | ARRIFCSSTRCYFYFDY          | 1                   | 2-5            | 2/3            | LLYNHCHLTV    | nd                  |     |            |         |  |
| C-270 | 3-23           | 3-3/2-21       | 6              | AKDLNNVVIAPAVNYYYHGMVDV    | 5                   | 1-44           | 3              | AAWDDSLNGSWM  | 2                   |     |            |         |  |
| C-277 | 3-64           | 1-7            | 4              | VIRGAYRGNVPEY              | 11                  | 1-47           | 3              | AAWDDSLSGV    | 2                   |     |            |         |  |
| C-288 | 3-48           | 3-3/3-10       | 6              | ASVGLPSLIYHGMVDV           | 8                   | 1-40           | 1              | QSYDSSLSGV    | 2                   |     |            |         |  |
| C-289 | 3-30           | 2-8/5-24       | 5              | ARDMASTANNWFEP             | 14                  | 2-14           | 1              | SSYTSNVY      | 2                   |     |            |         |  |
| C-292 | 1-69           | 3-3            | 4              | ARVENALRTLDDY              | 6                   | 2-14           | 2/3            | SSYTRSTLEVL   | 3                   |     |            |         |  |
| C-294 | 3-73           | 3-16           | 6              | TROGGDSLSSLYYGMVDV         | 3                   | 1-44           | 1              | AAWDDLSAVY    | 3                   |     |            |         |  |
| C-310 | 1-46           | 3-22           | 4              | ARGEVDGTGHYDITDYYPYLYFEY   | 7                   | 2-8            | 1              | NSYAGRNNY     | 3                   | R   | R          | R       |  |
| C-318 | 1-2            | 3-10/2-8       | 6              | ARARITPAGVNGMVDV           | nd                  | 3-1            | 2/3            | QAWDSTVW      | 4                   |     |            |         |  |
| C-319 | 3-7            | 3-10/5-12/3-3  | 4              | ARDVFGITRSAHRY             | 8                   | 1-44           | 3              | AAWDDSLNGWV   | 2                   |     |            |         |  |
| C-320 | 4-34           | 3-16           | 6              | ARGPRTYSSROFYFYNYAMVDV     | 7                   | 2-23           | 3              | CSYAGSTFL     | 4                   |     |            |         |  |
| C-329 | 1-2            | 4-4/4-11       | 6              | ARAWGLODYGMVDV             | nd                  | 2-14           | 2/3            | SSYTSSTLV     | 2                   |     |            |         |  |
| C-406 | 1-3            | 3-3/3-10/3-16  | 6              | AKGAKGSYVGVVDV             | 17                  | 2-23           | 3              | LSYAGSKWV     | 3                   |     |            |         |  |
| C-413 | 5-51           | 4-23           | 4              | VRRPPDYGNSGIDY             | 7                   | 2-14           | 1              | SSFSSGSLVY    | 4                   | R   | R          | R       |  |
| C-419 | 3-15           | 3-9            | 6              | TTVGTYSDLTCHRYYYNYMVDV     | 11                  | 1-51           | 1              | GTWDSTLNIFY   | 6                   | R   | R          | R       |  |
| C-431 | 4-34           | 3-3            | 6              | ARGRYRWFVSDLQSEADYFGLDV    | 5                   | 1-47           | 3              | AAWDDSLSGFQV  | 2                   |     |            |         |  |
| C-437 | 3-23           | 1-26           | 4              | AKERVFGSFSYFDY             | 7                   | 2-11           | 2/3            | CSFATVNLV     | 8                   | NR  | NR         | R       |  |
| C-444 | 3-23           | 3-10/5-12      | 4/5            | IKDRGMMPTRADF              | 14                  | 6-57           | 3              | QSYDNNFNWV    | 2                   |     |            |         |  |
| C-445 | 3-15           | 6-19           | 4              | TTDGLAVAFDY                | 8                   | 3-25           | 2/3            | QASDSSGTYL    | 4                   |     |            |         |  |
| C-462 | 5-51           | 6-6/2-21/6-25  | 5              | ARRIAAQGDWLDV              | 7                   | 1-44           | 2/3            | AGWDDSLNGPV   | nd                  |     |            |         |  |
| C-477 | 4-39           | 3-10           | 4              | ARPHSGMTRTEVGFAY           | nd                  | 2-23           | 3              | CAHAGSTWV     | 7                   |     |            |         |  |
| C-479 | 3-7            | 3-9/6-19       | 4              | ASLEGSYFDY                 | 9                   | 1-40           | 3              | QSYDRLSASNWV  | nd                  |     |            |         |  |
| C-482 | 5-51           | 4-11/4-4       | 4              | AROYDYFNHFDL               | 12                  | 1-47           | 3              | AAWDTLRSGV    | 4                   |     |            |         |  |
| C-484 | 3-73           | 3-3            | 6              | SRSVTTFVGTTRSHNGMDI        | 5                   | 3-1            | 2/3            | QAWDYSTAY     | 4                   |     |            |         |  |
| C-485 | 4-59           | 3-22           | 6              | AREGGVYGGYGMVDV            | nd                  | 9-49           | 2/3            | GADHSGSNNFV   | 4                   |     |            |         |  |
| C-487 | 3-33           | 3-10           | 6              | ARGYSVMVRGVIHSDNYGLDF      | 6                   | 1-40           | 3              | QSYDSSLSGWL   | nd                  |     |            |         |  |
| C-491 | 1-46           |                |                |                            |                     |                |                |               |                     |     |            |         |  |

Table S2: Ig gene analysis and antibody reactivity of HCV E2 peptide (aa483-499)-binding memory B cells from patient SR-2.

| IG    | HEAVY CHAIN    |                |                |                         |                     | LIGHT CHAIN    |                |                   |                     | REACTIVITY |       |         |
|-------|----------------|----------------|----------------|-------------------------|---------------------|----------------|----------------|-------------------|---------------------|------------|-------|---------|
|       | V <sub>H</sub> | D              | J <sub>H</sub> | IgH-CDR3 (aa)           | V <sub>H</sub> -Mut | V <sub>K</sub> | J <sub>K</sub> | Igk-CDR3 (aa)     | V <sub>K</sub> -Mut | LPS        | dsDNA | Insulin |
| J-021 | 3-30           | 3-3            | 4              | AKDRGGGGGAIFGVVFPMTIDY  | 5                   | 1-39           | 4              | QOSYSVPLT         | 4                   | R          | R     | R       |
| J-026 | 3-73           | 6-19           | 4              | TRLOWDTSGWYRAGDY        | 5                   | 4-1            | 4              | HOYYITPLT         | 1                   | R          | R     | R       |
| J-027 | 3-33           | 3-22           | 3              | ARIHNYDSIGYSSDAFDI      | 3                   | 1-39           | 1              | QOSSNFPRT         | 3                   | R          | R     | R       |
| J-029 | 3-48           | 1-14           | 6              | ARRANVRYMVIPIPVITGSMVDV | 13                  | 3-20           | 2              | QRSGGSPGT         | 7                   |            |       |         |
| J-030 | 4-4            | 6-19           | 5              | CCSGGRLRLHS             | nd                  | 1D-33          | 5              | QOYYNPLPT         | 5                   |            |       |         |
| J-036 | 3-23           | 5-5/18         | 6              | AKGNTAMWYYALDV          | 7                   | 2-28           | 4              | MOSLQTLPT         | 3                   |            |       |         |
| J-037 | 1-18           | 6-19           | 6              | ARDGLADYYGLDV           | nd                  | 2-28           | 4              | MAAQOTLT          | 2                   |            |       |         |
| J-040 | 1-46           | 3-9            | 4              | ARARHPKRDSIDWLLSPSSMGY  | 13                  | 4-1            | 2              | QOYHSTPYT         | 6                   |            |       |         |
| J-050 | 1-2            | 3-10/3-16      | 6              | ARENLTFTFHGMVDV         | 16                  | 1-39           | 1              | QOYNSPPWT         | 7                   |            |       |         |
| J-059 | 3-30           | 3-10           | 6              | AKEGDSRGLGPFDI          | 6                   | 3-15           | 1              | QOYNNWPLWT        | 3                   |            |       |         |
| J-062 | 4-31           | 3-10           | 3              | VRDASRIPVVRGNKADTFDI    | 11                  | 1-9            | 2              | QOLSNNPYT         | 7                   |            |       |         |
| J-082 | 3-11           | 5-12           | 3              | ASRTYSYGDAFDI           | 17                  | 1-9            | 3              | QYLNTPSFT         | 4                   | R          | R     | R       |
| J-089 | 4-30-4         | 3-10           | 5              | ARLLFRGVNWFDP           | nd                  | 1D-33          | 4              | QOYLNPLPT         | 3                   |            |       |         |
| J-094 | 3-23           | 5-5/18         | 4              | AKDRYGFATFEF            | 8                   | 1-12           | 2              | QQAQSPPYT         | 4                   |            |       |         |
| J-101 | 3-15           | 3-22           | 6              | THYYESGGHYWGMVDV        | 7                   | 2D-29          | 2              | MOSSQLMYT         | nd                  |            |       |         |
| J-110 | 4-61           | 2-2/15         | 5              | ARGYCSGSNCGEGDKWFDP     | nd                  | 1-39           | 3              | QOSYGFPT          | 12                  |            |       |         |
| J-122 | 1-58           | 1-26           | 4              | ATDGGVGFDFY             | 2                   | 1-39           | 1              | QORYSTPWT         | 4                   |            |       |         |
| J-123 | 3-21           | 7-27           | 4              | AREISWGNFDL             | 7                   | 2D-29          | 2              | SOSTHVPT          | nd                  |            |       |         |
| J-124 | 3-21           | 6-13/6-19/6-25 | 4              | ARVLGIAVGPIDY           | 9                   | 3-15           | 1              | QOSNNTSSA         | nd                  |            |       |         |
| J-127 | 1-69           | 3-3            | 3              | ARDORRHIFDSSGGGAFDF     | 13                  | 3-20           | 1              | QYGNDSRPT         | 2                   | NR         | NR    | NR      |
| J-133 | 3-30-3         | 3-3            | 4              | ARGGRSGYSGY             | 5                   | 4-1            | 3              | QOYYTPT           | 2                   |            |       |         |
| J-135 | 4-61           | 5-24           | 4              | ARFCRDGYAEYFDY          | 7                   | 3-20           | 4              | QOYASSLT          | 4                   |            |       |         |
| J-138 | 1-69           | 6-19/6-25      | 4/5            | GYRYSYGAFDK             | 6                   | 3-20           | 1              | QOYGSPT           | 1                   | R          | R     | R       |
| J-139 | 1-46           | 1-7/1-20/3-9   | 4/5            | ARTSMGSONQDWLNHDAFDL    | 16                  | 4-1            | 2              | QOYFRTPYT         | 6                   |            |       |         |
| J-142 | 3-30           | 3-22           | 3              | AKDLNYYDSSGYFGGAFDI     | 3                   | 1-8            | 1              | QOYYTPT           | 2                   |            |       |         |
| J-145 | 3-11           | 3-3            | 4              | ARGPWVSPFEY             | 7                   | 3-20           | 2              | QOYSSAPT          | 4                   | R          | R     | R       |
| J-146 | 3-48           | 3-22           | 6              | ARGSPFNKYLVPDITGSMVDV   | 11                  | 3-20           | 2              | QOYSSPWT          | 4                   | NR         | NR    | NR      |
| J-148 | 1-69           | 3-9            | 4              | ATGDLLTYGYSFFDD         | 10                  | 1-5            | 1              | QOYKSWT           | 5                   |            |       |         |
| J-150 | 4-34           | 3-16/6-19      | 4              | ARGSGSHYHRRARWVFDY      | nd                  | 2-28           | 3              | MOSLHTPFT         | 4                   | NR         | NR    | NR      |
| J-151 | 3-15           | 2-21           | 3              | TTSWACGGDCNDVFDI        | 5                   | 1-5            | 4              | QOYNTPLT          | 4                   | R          | R     | R       |
| J-153 | 3-53           | 3-16           | 6              | ARDLGYGMDV              | 3                   | 3-11           | 1              | QORTNWLGT         | 0                   |            |       |         |
| J-157 | 4-34           | 2-21/3-3       | 4              | ARGLELWLVSYGY           | 9                   | 3-15           | 1              | QOYHFWPRT         | 9                   |            |       |         |
| J-165 | 4-61           | 3-22           | 3              | ARKATFYSDFSGFSVFDI      | nd                  | 1-9            | 4              | QQLNRYPT          | 3                   |            |       |         |
| J-166 | 3-30           | 1-7/6-6        | 4              | VSVGTKLWAY              | 5                   | 1-9            | 2              | QQLNGPYT          | 3                   |            |       |         |
| J-168 | 3-11           | 4-17/4-23/5-12 | 2              | ARGRYGAYFDL             | 13                  | 3-20           | 3              | QOYSSPFT          | 3                   | NR         | NR    | NR      |
| J-171 | 1-69           | 5-24           | 6              | ARIVRDYVPEVYFYAMVDV     | 4                   | 3-20           | 2              | QOYSSPOYT         | 1                   |            |       |         |
| J-183 | 3-15           | 3-3/5-5        | 4/6            | VRQGGYEFRL              | 20                  | 3-20           | 4              | QOYNSPLT          | 6                   |            |       |         |
| J-193 | 3-9            | 3-16           | 5              | VKAPRAWGGFDP            | 5                   | 1-39           | 4              | QOYSTRPT          | 5                   |            |       |         |
| J-202 | 4-61           | 2-15           | 6              | GRGSCNCGSCYPNFNVDV      | nd                  | 1-39           | 2              | QOYSSRPT          | 2                   |            |       |         |
| J-205 | 3-73           | 6-19           | 4/5            | TRLEWNTNHWYRAGDF        | 7                   | 4-1            | 4              | HYYIVPLT          | 2                   |            |       |         |
| J-216 | 3-9            | 3-9            | 5              | AKDQNDLITGDNWDFP        | 3                   | 1-5            | 1              | QOYNSWT           | 2                   |            |       |         |
| J-222 | 3-30           | 3-10/6-19      | 6              | AKDFGKGYAYHYMDV         | nd                  | 3-15           | 1              | QOYKRRPA          | 9                   |            |       |         |
| J-236 | 4-59           | 2-21/3-16      | 4              | GTNTAIGDCDHYFDY         | nd                  | 3-11           | 3              | HRTNWLPLFT        | 2                   |            |       |         |
| J-238 | 4-31           | 3-3/3-9        | 4              | AKNKGSGVPLQY            | 10                  | 3-15           | 1              | QOYNSPPWT         | 3                   |            |       |         |
| J-252 | 3-48           | 5-12           | 4              | ARDQWASVDMYYEY          | 9                   | 1-39           | 2              | QOYSPYT           | 7                   |            |       |         |
| J-253 | 1-69           | 3-22           | 4              | ARVGYDSDNGYLLDQFDQ      | nd                  | 1-39           | 4              | QOYSTPRCT         | 3                   |            |       |         |
| J-269 | 3-23           | 7-27           | 4/5            | AKLGVYRDIET             | nd                  | 1-39           | 3              | LQSYSPFT          | 5                   |            |       |         |
| J-271 | 3-49           | 3-10           | 4              | AGANYGSGSAPFDY          | 8                   | 1-5            | 1              | QOYSTFFA          | 5                   |            |       |         |
| J-272 | 4-31           | 6-6            | 6              | AREEWGKYSARGLDV         | 10                  | 1-39           | 1              | QOYSTSPRT         | 8                   |            |       |         |
| J-274 | 3-73           | 3-16           | 4              | VREERYDYGGMVDV          | nd                  | 1-39           | 4              | nd                | 9                   |            |       |         |
| J-276 | 5-51           | 5-24/6-19      | 4              | ARLREVAIAISHGDY         | nd                  | 1-9            | 1              | QRDYSYPPWT        | 2                   | R          | R     | R       |
| J-282 | 3-33           | 2-21           | 4              | AKFGAYSLESSFDG          | nd                  | 1-16           | 4              | QOYSSPFT          | 3                   |            |       |         |
| J-284 | 3-21           | 3-16/4-4/4-11  | 6              | ARCLQYYAMVDV            | 3                   | 2-28           | 4              | MALQTLPT          | 0                   | R          | R     | R       |
| J-287 | 3-48           | 1-14/2-21/5-24 | 6              | TTEIPNR                 | 8                   | 1-27           | 1              | QKYDASLWT         | 4                   |            |       |         |
| J-288 | 1-46           | 3-10           | 4              | ALMDYESSRY              | 8                   | 3-11           | 4              | QOYNSPST          | 1                   | R          | R     | R       |
| J-294 | 4-39           | 3-22           | 4              | ARHDRYNSAYHH            | 7                   | 1-5            | 1              | QOYNDLWT          | 5                   | NR         | NR    | NR      |
| SR-2  | V <sub>H</sub> | D              | J <sub>H</sub> | IgH-CDR3 (aa)           | V <sub>H</sub> -Mut | V <sub>K</sub> | J <sub>K</sub> | Igk-CDR3 (aa)     | V <sub>K</sub> -Mut | LPS        | dsDNA | Insulin |
| J-002 | 1-2            | 4-4/4-11       | 4/5            | ARGHYSTWYG              | nd                  | 1-44           | 1              | AAWDASLNGPVLGTGTR | 5                   |            |       |         |
| J-014 | 4-34           | 3-22           | 4              | ARRSHITMIVLSDYIDY       | 7                   | 2-23           | nd             | nd                | 6                   |            |       |         |
| J-015 | 3-23           | 2-15           | 4/5            | AKDTSSRCSSGTCYLSIDF     | 3                   | 4-69           | 2/3            | OTWGTGIYVV        | 2                   |            |       |         |
| J-028 | 1-3            | 4-4/4-11       | 6              | ARTSNYYWFDV             | 30                  | 3-21           | 1              | QWDTSSDHYV        | 0                   |            |       |         |
| J-064 | 3-48           | 3-16           | 4              | AREGTYYDWFAY            | 12                  | 2-23           | nd             | nd                | 6                   |            |       |         |
| J-067 | 4-30-4         | 3-10           | 4              | ARVNGDAFDY              | 14                  | 3-21           | 1              | QVWDPNSDHLVY      | 2                   |            |       |         |
| J-068 | 3-23           | 6-13           | 4              | AKRIGIAAGSRGLDY         | 8                   | 2-14           | 1              | SSFTNSRSVY        | 5                   |            |       |         |
| J-069 | 3-30           | 2-15           | 6              | AKDFREWWYAYHYMDV        | 7                   | 1-51           | 1              | GTWDSLSSEYV       | 7                   |            |       |         |
| J-078 | 3-71           | 4-4/4-11       | 4              | TSNYGYVYFDY             | 21                  | 1-40           | 2/3            | QSYDRTLIGYVV      | 5                   |            |       |         |
| J-091 | 3-30           | 5-12           | 3              | AKDYSYDFDPAFDI          | nd                  | 1-40           | 2/3            | QSYDRTLSHVVH      | 2                   |            |       |         |
| J-095 | 4-61           | 3-3            | 5              | ARRISIGVDNWFDP          | nd                  | 2-23           | 2/3            | CSYAGRLV          | 5                   |            |       |         |
| J-103 | 3-30           | nd             | 4              | ARSVGGHFDY              | 6                   | 3-21           | 3              | QVWYSSDHPGV       | 1                   |            |       |         |
| J-116 | 1-69           | 3-3            | 6              | ARDPPVITTTGVIYGMVDV     | 3                   | 2-23           | 2/3            | CSYAGFSTI         | 3                   | R          | R     | R       |
| J-140 | 4-31           | 4-17           | 3              | AREGNFGDYMFAFDI         | nd                  | 2-8            | 3              | TSYAGYHTGV        | 4                   | R          | R     | R       |
| J-141 | 3-53           | 5-24           | 4              | ASOKMANAALDY            | 9                   | 2-8            | 2/3            | SSYAGSNLV         | 3                   |            |       |         |
| J-144 | 3-72           | 3-3/5-5        | 4              | VRQGGYEFAY              | 20                  | 2-14           | 2/3            | SSYTNSPVT         | 2                   |            |       |         |
| J-147 | 3-23           | 1-26           | 4              | TKSPGWELMYFDY           | 3                   | 1-47           | 3              | APWDSLSGPG        | 0                   |            |       |         |
| J-156 | 4-30-2         | 3-9            | 4              | ARGMDTAGFDTTISHYFDY     | 12                  | 2-5            | 2/3            | nd                | nd                  |            |       |         |
| J-161 | 3-7            | 3-10           | 4/5            | AMFGLAETLDS             | 6                   | 2-11           | 1              | CSSAGLHSHVY       | 6                   |            |       |         |
| J-176 | 3-30           | 1-26           | 4              | AKERVRYRGGYSYFDY        | 6                   | 1-51           | 3              | GTWDSLSRAWV       | 1                   |            |       |         |
| J-181 | 3-48           | 2-2            | 4              | ASWYQLPGDY              | 3                   | 1-44           | 2/3            | VTWDSLSNGPV       | 4                   |            |       |         |
| J-182 | 3-9            | 3-10           | 4              | ARDMRHFFGSGTYGFDY       | 5                   | 1-47           | 2/3            | ATWDSLSGVV        | nd                  |            |       |         |
| J-186 | 1-2            | 6-19           | 4              | SRGRRWSSGWYDDY          | 7                   | 1-44           | 3              | AAWDSLSNGWV       | 3                   |            |       |         |
| J-214 | 4-31           | 3-3            | 6              | ARAPYDWTGDRSYGMDV       | 10                  | 2-8            | 2/3            | SSFSGNNHVV        | 2                   |            |       |         |
| J-235 | 5-51           | 1-26           | 5              | AKRSFGSFRGNWFHP         | nd                  | 1-40           | 2/3            | QSYDRSLASAI       | 4                   |            |       |         |
| J-241 | 5-51           | 5-24           | 5              | AGVGPRIVATMLRDGGFGP     | 7                   | 1-47           | 1              | AAWDSLSDDV        | 4                   | NR         | NR    | NR      |
| J-247 | 3-30           | 2-15           | 6              | AKDFREWWYAYHYMDV        | nd                  | 2-23           | nd             | nd                | nd                  |            |       |         |
| J-249 | 5-8            | 4-17           | 5              | ARRSGYGDYKRGWFDV        | 14                  | 1-51           | 2/3            | SVSDNNLRVV        | 4                   |            |       |         |
| J-250 | 3-23           | 2-21           | 4              | AKFLGAYSLESSFDG         | nd                  | 6-57           | 3              | QSYDTTKRGEV       | 1                   |            |       |         |
| J-289 | 5-51           | 5-24           | 4              | ARSGLGYNPGDY            | 2                   | 1-47           | 2/3            | EAWDSLSSTVV       | nd                  |            |       |         |

aa: amino acids; V-Mut: no. of mutations within V region; nd: not determined; R: reactive in ELISA; NR: not reactive in ELISA; clonally related antibodies are indicate in the same color

Table S3: Ig gene analysis and antibody reactivity of HCV E2 peptide (aa 483-499)-binding memory B cells from patient SR-4.

| SR-4  | HEAVY CHAIN    |                  |                |                          |                     | LIGHT CHAIN    |                |               |                     |     | REACTIVITY |         |  |
|-------|----------------|------------------|----------------|--------------------------|---------------------|----------------|----------------|---------------|---------------------|-----|------------|---------|--|
|       | V <sub>H</sub> | D                | J <sub>H</sub> | IgH-CDR3 (aa)            | V <sub>H</sub> -Mut | V <sub>K</sub> | J <sub>K</sub> | Igk-CDR3 (aa) | V <sub>K</sub> -Mut | LPS | dsDNA      | Insulin |  |
| M-003 | 3-30           | 2-2/ 4-17/ 6-6   | nd             | AKSQLHLKR                | 8                   | 1-5            | 1              | QRVNSYSSWT    | nd                  |     |            |         |  |
| M-101 | 3-15           | 1-7              | 2              | nd                       | nd                  | 2-28           | 1              | MGALQTWT      | 1                   |     |            |         |  |
| M-118 | 3-23           | 6-19             | 4              | AKDPGRSGSGTWDY           | 11                  | 3-11           | 2              | QRSDWPRYT     | nd                  |     |            |         |  |
| M-145 | 1-3            | 5-5/ 5-18        | 6              | ASPVGYCYRYHYHYGMDV       | nd                  | 2-28           | 2              | MKRIQSEH      | nd                  |     |            |         |  |
| M-164 | 1-69           | 3-22             | x              | ARGNQHYESSNY             | 14                  | 3-15           | 2              | QOYNDWPGT     | nd                  |     |            |         |  |
| M-167 | 3-23           | 3-10             | 2              | AKDRGLYLIVL              | nd                  | 1-27           | 4              | QTYHGAPK      | nd                  |     |            |         |  |
| M-201 | 3-9            | 3-3              | 4              | ARQLRLTSTYRKYDSTPGVYFDY  | 11                  | 1-39           | 4              | QOQYTSLT      | 4                   | R   | R          | R       |  |
| M-211 | 4-39           | 4-23             | 4              | ARDRRGGWARFDY            | 9                   | 3-20           | 2              | QOQYTSPPYIT   | 5                   | NR  | R          | R       |  |
| M-238 | 3-21           | 3-10             | 4              | ARWKSVYLAIVAFYD          | 10                  | 4-1            | 3              | QOQYTSPPA     | 7                   |     |            |         |  |
| M-240 | 1-69           | 3-22             | 6              | ARGRYHDSSDHYLEVPPYYGMDV  | 5                   | 1-9            | 3              | QHLNTYLLFT    | 3                   | NR  | NR         | NR      |  |
| M-243 | 3-48           | 5-5              | 1/4            | ARESDSYGVGDH             | 8                   | 3-20           | 1              | QOQYSSPPWT    | 3                   |     |            |         |  |
| M-254 | 4-31           | 1-7              | 4              | ARESVGWNYWGHDC           | 12                  | 3-11           | 2              | QORDNWPRT     | 6                   |     |            |         |  |
| M-286 | 3-15           | 6-19             | 4              | TTDGEQWLDYVFDY           | 6                   | 1-17           | 1              | LOHNNYPPWT    | 2                   | R   | R          | R       |  |
| M-292 | 4-30-4         | 3-3/ 3-22        | 6              | ARDLGHYDSWGGYPLRMGMDV    | nd                  | 1-39           | 1              | QOYSTPWT      | 4                   |     |            |         |  |
| M-313 | 3-49           | 6-6              | 5              | AKGRIGRRLHWFDP           | 11                  | 3-15           | 2              | QOYNNWPPY     | 5                   |     |            |         |  |
| M-317 | 3-48           | 2-2/ 2-21        | 4/ 5           | ARGSSSTSSYIDH            | 12                  | 3-15           | 4              | QOYNNWRIG     | nd                  |     |            |         |  |
| M-322 | 1-2            | 4-17             | 4              | ARGVYDGFSDY              | 14                  | 1-17           | 3              | LQHSYDPT      | 2                   |     |            |         |  |
| M-330 | 3-7            | 3-16             | 4              | VGWGGVAHY                | 7                   | 3-11           | 2              | QORSNWPPY     | 0                   |     |            |         |  |
| M-332 | 4-30-4         | 3-9              | 4              | AGGNDFSTGLDY             | 14                  | 3-11           | 5              | QORSNWPGFT    | 5                   |     |            |         |  |
| M-333 | 3-30           | 3-9              | 4              | AKESVLRFFDWFSSKFFYDS     | 5                   | 3-15           | 1              | QOYNNWPLA     | 2                   |     |            |         |  |
| M-334 | 3-9            | 5-5/ 5-18        | 4              | AKDRHRYPSMVFYD           | 4                   | 1D-33          | 2              | QHYDHLPT      | 3                   |     |            |         |  |
| M-336 | 4-30-4         | 3-3/ 3-9         | 4              | AGGDHDFSTGLDY            | 11                  | 3-11           | 5              | QORSNWPGFT    | 5                   |     |            |         |  |
| M-339 | 3-23           | 1-26/ 5-24       | 4              | VKSSRGVVRDGGDGIY         | 9                   | 1-5            | 1              | QOYDAYSWT     | 8                   |     |            |         |  |
| M-343 | 3-23           | 2-21             | 4              | VKDCGGGSCY               | 12                  | 1-6            | nd             | nd            | nd                  |     |            |         |  |
| M-345 | 4-31           | 3-10             | 4              | ARGLYVYGGSYFDH           | 3                   | 3-15           | 1              | QOYNNWPLW     | 0                   |     |            |         |  |
| M-363 | 1-2            | 2-15             | 4              | ARDVNLGYCSGVSCYVFDY      | 6                   | 2-30           | 1              | MQGTHWPT      | 2                   |     |            |         |  |
| M-369 | 5-51           | nd               | 4              | AKGKEGFDY                | nd                  | 2-28           | 2              | MQALQTPYT     | 1                   |     |            |         |  |
| M-389 | 4-30-4         | 3-22             | 5              | AAEAGASDYHISGYFF         | 6                   | 1-39           | 4              | QOYSTPOT      | 7                   | NR  | R          | R       |  |
| M-407 | 1-69           | 3-3/ 3-9         | 4              | ATDILRDLPS               | 12                  | 2-30           | 1              | MQGTHWPT      | 4                   | NR  | NR         | NR      |  |
| M-409 | 3-66           | 3-10             | 6              | WGFELGGIRYGR             | 0                   | 3-15           | 2              | QOYNNWPF      | 0                   |     |            |         |  |
| M-410 | 4-39           | 2-15/ 2-21       | 4              | ARRWVSSFFDY              | nd                  | 3-15           | 4              | QOYNDWPLT     | 5                   |     |            |         |  |
| M-426 | 3-49           | 4-4/ 4-11        | 4              | STLTWPTGRDY              | 7                   | 3-11           | 3              | QORSNWPPY     | 2                   |     |            |         |  |
| M-429 | 3-23           | 3-10             | 4              | AKFRPYGSSGSDY            | 6                   | 1-39           | 4              | QOYSTPSS      | nd                  | R   | R          | R       |  |
| M-430 | 1-46           | 3-9/ 4-4/ 4-11   | 5              | ASDDFRSNCFDL             | nd                  | 3-20           | 3              | QOYSSPLT      | 4                   |     |            |         |  |
| M-435 | 3-30-3         | 3-3/ 5-12        | 4              | ARDEEVPVGNAYDFEY         | 6                   | 1-39           | 1              | QOYSLGT       | 2                   |     |            |         |  |
| M-437 | 3-23           | 1-7              | 4              | ATDNWNYCLGDY             | 7                   | 2-24           | 4              | MQTTQLPRS     | 4                   |     |            |         |  |
| M-441 | 4-31           | 6-19             | 5              | nd                       | 9                   | 3-15           | 1              | HOYNNWGT      | 3                   |     |            |         |  |
| M-448 | 1-69           | 1-26             | 5              | AKPPVATGGFDI             | 10                  | 1D-33          | 3              | QOYNSPLFTT    | 5                   | NR  | NR         | NR      |  |
| M-449 | 3-23           | 6-19             | 4              | AKGDKAVAGTAGFDY          | 9                   | 1D-33          | 2              | LOYDHLVPMY    | 5                   |     |            |         |  |
| M-457 | 3-23           | 2-21/ 5-12       | 4/ 5           | VKDVWVQLF                | 10                  | 1-27           | 4              | QSYTVPPVLS    | 5                   |     |            |         |  |
| M-463 | 3-23           | 5-24             | 4/ 5           | AKGSSRGVARDYAGNC         | 8                   | 1-5            | 1              | QOYNDYVIT     | 3                   | NR  | R          | R       |  |
| M-490 | 3-30           | 3-3              | 5              | AKDLLFFSKNSRSVGSFDS      | 15                  | 1-39           | 5              | QOYSLPIT      | 22                  | R   | R          | R       |  |
| M-507 | 1-2            | 3-16             | 6              | ARVLVITGAGKYFYDYGMDV     | 4                   | 1-13           | 2              | QOYSTFPYT     | nd                  |     |            |         |  |
| M-514 | 3-11           | 2-21/ 3-3/ 6-19  | 4/ 5           | ARASVLF                  | 5                   | 3D-15          | 3              | QOYDSWPF      | 3                   | R   | R          | R       |  |
| M-519 | 4-30-4         | 3-10/ 5-12/ 6-19 | 4/ 5           | TRDVLRGWDDQ              | 15                  | 3-15           | 2              | QOYNNWPPG     | 10                  | NR  | NR         | NR      |  |
| M-529 | 4-b            | 5-24             | 4              | AKSLTKTNYFDY             | 4                   | 1-5            | 1              | QOYNSFGT      | 5                   |     |            |         |  |
| M-530 | 1-69           | 3-3              | 4              | ARSLNYDFWGSYYFDY         | nd                  | 1-5            | 1              | QOYNSFSKT     | 12                  |     |            |         |  |
| M-533 | 4-4            | 3-10             | 5              | TRDRGATGDDH              | 17                  | 3-11           | 3              | QORFIWPR      | 4                   |     |            |         |  |
| M-535 | 3-23           | 3-22             | 4              | AKRDYSDGSDYVPLDF         | 5                   | 1-5            | 2              | QOYNNVLT      | 6                   | NR  | NR         | NR      |  |
| M-703 | 3-23           | 3-16             | 4              | nd                       | nd                  | 2-28           | 1/3            | MQALQSPRT     | 4                   |     |            |         |  |
| M-705 | 4-61           | 1-26             | 5              | SRVFGELDR                | 8                   | 1-5            | 2              | QOYNSLHT      | 3                   | NR  | NR         | R       |  |
| M-713 | 4-30-4         | 5-5/ 5-18        | 4              | ARRRGVNYGYGALFDY         | 10                  | 1D-33          | 3              | QOYDHLPPFT    | 2                   |     |            |         |  |
| M-802 | 3-15           | 3-3              | 6              | nd                       | nd                  | 2-30           | 3              | MQGAHWPPGFT   | 3                   |     |            |         |  |
| M-824 | 1-46           | 3-16             | 4              | ARNDFGDYGRVSGY           | nd                  | 3-20           | 2              | QOYSSSTGYT    | 3                   | R   | R          | R       |  |
| M-825 | 4-39           | 2-21/ 5-24       | 3/ 6           | nd                       | nd                  | 1-5            | 2              | QOYNSLYI      | 2                   |     |            |         |  |
| M-834 | 4-61           | 3-10/ 3-16/ 3-22 | 6              | SRDGRADFGGYYA            | 8                   | 1-39           | 2              | QOYSTPRT      | 4                   | NR  | NR         | NR      |  |
| M-840 | 4-59           | nd               | 6              | ARGASVYDYHYAMDV          | 11                  | 3-20           | 2              | HOYGGSPYT     | 6                   |     |            |         |  |
| M-841 | 5-51           | 2-21/ 5-5/ 5-18  | 4              | VRLDGFDDY                | 9                   | 1-39           | 1              | VANFSD        | 8                   |     |            |         |  |
| M-847 | 4-61           | 5-5/ 5-18        | 4              | ARYRLVETFDS              | nd                  | 1-12           | 4              | QOYNTFPPT     | 6                   |     |            |         |  |
| M-855 | 3-33           | 4-4/ 4-11/ 7-24  | 4/ 5           | nd                       | nd                  | 2D-24          | 4              | TOPTQFPRSL    | 2                   |     |            |         |  |
| M-859 | 1-69           | 3-10/ 3-16/ 4-17 | 6              | nd                       | nd                  | 1-17           | 3              | LOHNS         | nd                  |     |            |         |  |
| M-862 | 3-30           | 3-22             | 6              | AKDLVYSSPSLGPYYHYGMDV    | 7                   | 1-9            | 2              | QOYNSNPT      | 4                   | R   | R          | R       |  |
| M-867 | 3-23           | 2-2/ 3-16        | 3              | nd                       | nd                  | 3-20           | 2              | QHFSTSRAT     | 4                   |     |            |         |  |
| M-868 | 3-15           | 2-21             | 4/ 5           | VTAQCGDCHASTGSP          | nd                  | 3-11           | 5              | QORRNWPI      | 1                   |     |            |         |  |
| M-869 | 3-30-3         | 7-24             | 6              | ARDYKVENWGGRYYYYGMDV     | 5                   | 2-28           | 3              | MQALQTPFT     | 2                   | R   | R          | NR      |  |
| M-872 | 3-53           | 4-2              | 4              | AGRLATAAYDY              | 4                   | 2-28           | 1              | MQVOTPWT      | 2                   | R   | R          | NR      |  |
| M-877 | 1-2            | 5-5/ 5-18/ 6-19  | 1/ 4/ 5        | MRGVAPGSGYSGPQNVH        | 9                   | 3-20           | 3              | QOYVSPGFT     | 6                   | NR  | NR         | R       |  |
| M-879 | 4-59           | 4-4/ 4-11/ 4-17  | 6              | ARDGTSKYHYGMDV           | nd                  | 1-39           | 2              | QOYSTHT       | nd                  |     |            |         |  |
| M-882 | 1-8            | 3-3/ 3-10/ 3-16  | 4/ 5           | TRGLPTYVAFWDC            | 11                  | 1-39           | 1              | QOYSGVPT      | 7                   | R   | R          | R       |  |
| M-885 | 3-23           | 3-10/ 3-16       | 4/ 5           | nd                       | nd                  | 2D-40          | 4              | DOGGDO        | 4                   |     |            |         |  |
| M-886 | 4-39           | 2-15/ 3-22       | 4              | ARIDRRRPFDSGSGFPDY       | nd                  | 3-20           | 1              | HOYDPSPT      | 4                   |     |            |         |  |
| M-888 | 5-a            | 1-1/ 1-20        | 6              | nd                       | nd                  | 3-20           | 1              | QOYKTPWT      | 11                  |     |            |         |  |
| SR-4  | V <sub>H</sub> | D                | J <sub>H</sub> | IgH-CDR3 (aa)            | V <sub>H</sub> -Mut | V <sub>L</sub> | J <sub>L</sub> | Igk-CDR3 (aa) | V <sub>L</sub> -Mut | LPS | dsDNA      | Insulin |  |
| M-230 | 4-39           | 5-5/ 5-18        | 4              | ARRGNSFGPPSAPFDY         | 2                   | 2-14           | 2/3            | SSYTSSTLV     | 3                   |     |            |         |  |
| M-261 | 3-30           | 3-10             | 6              | ATTRDFYSGRNGGMDV         | 12                  | 8-61           | 1              | VLYMSSGWT     | 3                   | R   | R          | R       |  |
| M-306 | 3-49           | 3-9              | 6              | TRDGFVWLSITV             | 3                   | 2-14           | 1              | SSYTGNNTRPYV  | 2                   |     |            |         |  |
| M-312 | 3-72           | 3-10             | 4              | TTEGAYAGPDFDH            | 8                   | 1-44           | 3              | nd            | nd                  |     |            |         |  |
| M-318 | 3-9            | 1-1/ 1-20        | 6              | VKDSATLLYYNMDV           | 9                   | 1-47           | nd             | nd            | nd                  |     |            |         |  |
| M-358 | 3-h            | 3-16/ 6-12/ 6-19 | 4              | ARGEWLFLGRANDY           | nd                  | 2-11           | 2/3            | nd            | nd                  |     |            |         |  |
| M-413 | 3-23           | 3-10             | 4              | AKWGSLSLWFGVLLD          | 10                  | 1-47           | 3              | AAWDDSLSVW    | 1                   |     |            |         |  |
| M-422 | 3-74           | 2-2/ 2-15        | 4/ 5           | TTTLATEAA                | 5                   | 1-51           | 1              | GTWDDSLSAV    | 1                   | NR  | NR         | NR      |  |
| M-433 | 1-69           | nd               | 4              | ARIGHSYTESENFY           | 15                  | 1-47           | 3              | AAWDDSLNGW    | 4                   |     |            |         |  |
| M-458 | 3-15           | 2-21/ 4-23       | 3              | IRNSPYDAFI               | 4                   | 2-23           | 1              | CSYAGTSTYV    | 0                   | R   | R          | R       |  |
| M-460 | 1-69           | 3-3              | 6              | ARAERHSISVGVGPPSSVQYAMDV | 12                  | 1-40           | 3              | QSYDRSLGASV   | 3                   |     |            |         |  |
| M-463 | 4-59           | 1-26             | 3              | ARVISGRGRAFI             | 5                   | 1-47           | 2/3            | AAWDDSLSVL    | 3                   |     |            |         |  |
| M-493 | 3-53           | 1-7/ 4-11        | 4/ 5           | ARNVPTGTWVNF             | 5                   | 2-14           | 3              | KSYTSSL       | 6                   |     |            |         |  |
| M-494 | 3-30           | 5-12             | 4              | AKENSQWRFOYFDC           | 7                   | 1-44           | 1              | AGWDDSLNRV    | nd                  |     |            |         |  |
| M-512 | 3-15           | 3-10             | 4              | VTDSSGEWOPFFHY           | nd                  | 3-21           | 1              | QVWDISENVY    | 4                   |     |            |         |  |
| M-724 | 3-30           | 6-19             | 4              | AKCGQWLPSEYFDC           | 13                  | 1-44           | 1              | AAWDDSLNGV    | 5                   | NR  | NR         | NR      |  |
| M-801 | 1-46           | 3-10             | 5              | nd                       | nd                  | 1-51           | 2/3            | VPEEASLNSVL   | nd                  |     |            |         |  |
| M-805 | 4-4            | 6-6/ 6-13        | 4/ 5           | ASSNEYVGLHY              | 10                  | 2-8            | 1              | SSYAGNSV      | 4                   |     |            |         |  |
| M-806 | 4-59           | 3-10/ 3-16       | 5              | ARGGYSRIODFNWFD          | 8                   | 9-49           | 3              | GADHSGTGKFWV  | 3                   |     |            |         |  |
| M-808 | 3-53           | 6-19             | 6              | AAVSAIWAQYHYGMDV         | nd                  | 2-23           | 3              | CSNAASNETW    | 4                   |     |            |         |  |
| M-811 | 4-39           | 4-17             | 6              | ARVDVDDYDGYSLTSGMNV      | 6                   | 2-23           | 1              | CSYAGSSTYV    | 5                   |     |            |         |  |
| M-814 | 1-69           | 3-10             | 4              | ARGASGTLFFDY             | nd                  | 3-21           | 1              | QVCDVTDHYV    | nd                  |     |            |         |  |
| M-818 | 1-46           | 2-21             | 5              | GRGEVVAITODHLD           | 4                   | 2-23           | 2/3            | CSYAGSSTLV    | 2                   | R   | R          | R       |  |
| M-819 | 3-15           | 3-9              | 6              | TTDEILTYGSLD             | nd                  | 1-44           | 3              | APLGDLSNGR    | nd                  |     |            |         |  |
| M-822 | 3-23           | 6-6              | 2              | AKFAWEAYSSSGDFDL         | 9                   | 2-11           | 1              | CSYAGSYTYV    | 0                   |     |            |         |  |
| M-826 | 3-11           | 3-3              | 4              | ARVDFWGSYYLDY            | 8                   | 1-40           | 3              | HSYDNRQSGTW   | 4                   | R   | R          | R       |  |
| M-851 | 3-23           | 5-12             | 4              | AKDLRGGQNNIVAATDY        | nd                  | 2-14           | 1              | SSYTTSTLV     | 7                   |     |            |         |  |
| M-871 | 4-31           | 3-10/ 3-16       | 4              | ARRSYNFDI                | 4                   | 1-51           | 3              | GTWDRSLPGW    | 2                   |     |            |         |  |
| M-875 | 3-9            | 3-16             | 6              | ARGASVITGLTYHYGMDV       | 4                   | 2-11           | 2/3            | CSYAGSYTLV    | 3                   | NR  | NR         | NR      |  |

aa: amino acids; V-Mut: no. of mutations within V region; nd: not determined; R: reactive in ELISA; NR: not reactive in ELISA; clonally related antibodies are indicate in the same color

Table S4: Ig gene analysis and antibody reactivity of HCV E2 peptide (aa 483-499)-binding memory B cells from patient SR-5.

| IG    | HEAVY CHAIN    |                  |                |                          |                     | LIGHT CHAIN    |                |               |                     | REACTIVITY |       |         |
|-------|----------------|------------------|----------------|--------------------------|---------------------|----------------|----------------|---------------|---------------------|------------|-------|---------|
|       | V <sub>H</sub> | D                | J <sub>H</sub> | IgH-CDR3 (aa)            | V <sub>H</sub> -Mut | V <sub>K</sub> | J <sub>K</sub> | Igk-CDR3 (aa) | V <sub>K</sub> -Mut | LPS        | dsDNA | Insulin |
| Z-034 | 1-2            | 6-19             | 4/5            | ARLQWLSNAGFG             | 9                   | 1-5            | 1              | QOYNSYGVWT    | 6                   |            |       |         |
| Z-036 | 4-61           | 2-2/ 2-8         | 3              | ARDRRLRYHAFDM            | 9                   | 3-20           | 1              | QOYGSSLWVT    | 1                   | NR         | NR    | NR      |
| Z-037 | 1-18           | 3-16             | 4              | ARDLGLTDYELWLKRYRPPPYDY  | 10                  | 4-1            | 2              | QOYHTTPOYT    | 4                   |            |       |         |
| Z-038 | 3-23           | 2-8/ 3-16/ 6-6   | 5              | ARQVNRILDP               | 9                   | 3-15           | 2              | QOQDDNWPVYT   | 1                   |            |       |         |
| Z-203 | 3-74           | 6-19             | 6              | VRDSPVAGMKGDKYYGMDV      | 6                   | 1-39           | 4              | QOQSYTPR      | 2                   | R          | R     | R       |
| Z-205 | 3-33           | 3-10             | 3              | ARSGPDVAFDI              | 3                   | 3-20           | 3              | QOYSGPFGT     | nd                  | R          | R     | R       |
| Z-207 | 4-59           | 6-6              | 4              | ARWEARLDY                | 6                   | 4-1            | 1              | QOYYTIPWT     | 2                   |            |       |         |
| Z-208 | 4-59           | 6-21             | 3              | AARNVVPATNGRPIDV         | 8                   | 4-1            | 2              | QOYYSTPYT     | 4                   | R          | R     | R       |
| Z-211 | 4-39           | 2-21             | 3              | AGAHAYFSMDV              | 16                  | 3-15           | 2              | QOYNTWPS      | 4                   |            |       |         |
| Z-212 | 3-30           | 3-22             | 3              | AKTYYSATSGYFFYQH         | 7                   | 3-15           | 3              | QOYNNWPPFT    | 4                   |            |       |         |
| Z-221 | 4-59           | 2-21             | 3              | AGRNWVPAATDGRPIDI        | 9                   | 4-1            | nd             | nd            | nd                  |            |       |         |
| Z-222 | 4-59           | 2-21/ 3-16       | 4/5            | ATTDF                    | 6                   | 2-30           | nd             | nd            | nd                  |            |       |         |
| Z-233 | 4-39           | 6-13             | 6              | AROSAIVGAYYYFMDV         | 9                   | 3-15           | 1              | LOYNEWPPWT    | 6                   | NR         | NR    | NR      |
| Z-302 | 4-59           | 2-21             | 3              | AGRNWVPAATDGRPIDI        | 7                   | 4-1            | 2              | QOYYSTPYT     | 4                   | R          | R     | R       |
| Z-306 | 4-39           | 2-21             | 6              | VRLAISGYYHYMDV           | 10                  | 3-15           | 1              | LOYNEWPPWT    | nd                  |            |       |         |
| Z-313 | 5-51           | 6-19             | 3              | VRFRLSGGDAFDI            | 4                   | 1-16           | 3              | QOYDNFPFT     | 3                   |            |       |         |
| Z-315 | 4-39           | 1-26             | 4              | ARRYSGSHSYFDY            | 5                   | 1-39           | 3              | QOQSFLLT      | 4                   |            |       |         |
| Z-318 | 3-15           | 3-16             | 4              | ALPMLRGVPY               | 8                   | 3-11           | 4              | QORSDWPPPLT   | 4                   |            |       |         |
| Z-319 | 3-49           | 3-10/ 3-22       | 4              | TKDVSDMTEPPYFDS          | 13                  | 3-11           | 3              | QORGNWPPPL    | 9                   |            |       |         |
| Z-335 | 1-18           | 1-26             | 4              | ARSGSPSYGGILSDS          | 9                   | 1-39           | 1              | QOSHSPSWT     | 5                   |            |       |         |
| Z-336 | 4-59           | 4-4/ 4-11        | 6              | AGTRTENNSSGMDV           | nd                  | 4-1            | nd             | nd            | nd                  |            |       |         |
| Z-337 | 3-48           | 3-3              | 4              | ARGWNYDLWSGYSAPFDY       | 3                   | 1-17           | 4              | LOHNSYPLT     | 1                   |            |       |         |
| Z-339 | 4-34           | 1-26             | 6              | ARVKGAYLYFYHYMDV         | 3                   | 3-11           | 5              | QPRSNWPT      | 6                   |            |       |         |
| Z-341 | 3-11           | 3-9              | 4/5            | VVIPTGYKSGTFSF           | 12                  | 1-33           | 4              | QOYDTPPT      | 0                   |            |       |         |
| Z-345 | 4-59           | 2-21             | 3              | AGRNWVPAATDGRPIDI        | 7                   | 4-1            | 2              | QOYYSTPYT     | 4                   |            |       |         |
| Z-350 | 4-4            | 2-15             | 6              | AGSSFYHGLDV              | 11                  | 3-20           | 3              | QOYSSPFT      | 4                   |            |       |         |
| Z-352 | 4-59           | 3-10             | 4              | ARHLHYSSGIFHYLDS         | 11                  | 2-24           | 4              | MOQKFPPLT     | 3                   |            |       |         |
| Z-353 | 3-23           | 3-3              | 6              | AKVGGDFWRGATFYFYFMDV     | 6                   | 3-15           | 1              | QOYNNLWLT     | 4                   |            |       |         |
| Z-356 | 3-43           | 3-10/ 5-5/ 5-18  | 6              | AKDKNIWSPMDV             | 3                   | 3-11           | 4              | QORSNWPRVT    | 2                   |            |       |         |
| Z-357 | 4-59           | 3-10             | 4              | AGFRFRASDGRPIDI          | 6                   | 4-1            | 2              | QOYYSPYT      | 1                   |            |       |         |
| Z-363 | 4-4            | 2-2              | 4              | ATRLGYCDDTCKNPLFDH       | 4                   | 3-20           | 2              | QOYSSPMPYT    | 3                   |            |       |         |
| Z-367 | 3-9            | 2-21             | 3              | AILVVATARDVHDF           | 8                   | 3-15           | 2              | QOHNYYWT      | 4                   |            |       |         |
| Z-368 | 4-31           | 3-10             | 4              | ARERGYHDF                | 15                  | 3-15           | 2              | QOYDNWLYT     | 7                   |            |       |         |
| Z-376 | 4-61           | 3-22             | 4              | ASRSTSDSSGYPFDY          | 4                   | 3-15           | 2              | QOYYSPYT      | 1                   |            |       |         |
| Z-377 | 3-30-3         | 3-22             | 6              | VRKAANYGMDV              | 6                   | 1-6            | 3              | LDQYSHPT      | 6                   |            |       |         |
| Z-381 | 4-61           | 3-16             | 6              | GGTRTKVNNSSGMDV          | nd                  | 4-1            | 1              | QOYYSPWT      | 4                   |            |       |         |
| Z-382 | 4-39           | 3-3              | 4              | ARTTVFGGVIHPAFDS         | 12                  | 3-15           | 1              | QOYNNWPPWT    | 2                   |            |       |         |
| Z-401 | 4-61           | 2-2              | 6              | ARHAGSTSAWSDRPNRYKYIDV   | nd                  | 3-15           | 1              | QOYNNWPT      | 5                   |            |       |         |
| Z-406 | 3-48           | 3-16             | 6              | ARAGLNTNYDYTKRYRNYHYMDV  | 7                   | 3-15           | 1              | QOYNIWPT      | 2                   |            |       |         |
| Z-407 | 3-20           | 5-24             | 4              | ARDGRDEGHDY              | 6                   | 3-11           | 2              | QOLFKNPYT     | 4                   |            |       |         |
| Z-415 | 4-59           | 6-25             | 3              | ARVLESSVAFDI             | 5                   | 2-28           | 3              | MOALGTPT      | 0                   |            |       |         |
| Z-417 | 5-51           | 3-9/ 3-10/ 6-19  | 3              | TGVLFRNDWAPGVYGFDI       | 5                   | 3-15           | 1              | QOYNNWPPWT    | 3                   |            |       |         |
| Z-446 | 4-49           | 3-10/ 3-16       | 6              | VSRTLPTSHSPGGY           | nd                  | 2-28           | 2              | MOALGTWST     | 5                   |            |       |         |
| Z-448 | 4-39           | 6-13             | 6              | GRHRAIGHYHYFMDV          | 10                  | 3-15           | 2              | LOYNEWPPCT    | 3                   |            |       |         |
| Z-451 | 3-11           | 3-3              | 4              | ARSFCSGNRCSYFYFDY        | 6                   | 1-5            | 1              | QOYNSYWT      | 0                   |            |       |         |
| Z-452 | 4-59           | 2-21             | 3              | AGRNWVPAAHGWGLIDI        | 9                   | 4-1            | 2              | QOYYSTPYT     | 4                   |            |       |         |
| Z-461 | 4-39           | 2-15/ 3-16       | 4              | ARRNLVGTTFDFY            | nd                  | 1-39           | 1              | QOQSLAPWT     | 6                   |            |       |         |
| Z-471 | 4-4            | 2-15             | 2              | ARDLEYCSGGRCSWFFDL       | 9                   | 3-20           | nd             | nd            | 4                   |            |       |         |
| Z-474 | 3-33           | 3-3              | 4              | AREGIGDSWGLYD            | 5                   | 3-15           | 2              | QOYNNWPHPT    | 2                   |            |       |         |
| Z-475 | 3-11           | 2-15/ 2-21       | 6              | ARHVNYSNYHYIDV           | 6                   | 3-15           | 1              | LOYNNWPPWT    | 3                   |            |       |         |
| Z-478 | 4-39           | 3-9              | 4              | VRSARRDLTYGRNKEKNHFDI    | 13                  | 3-20           | 5              | QOYGTST       | 2                   |            |       |         |
| Z-487 | 4-59           | 5-5/ 5-18        | 4              | ARVNSRPLAHFDY            | 10                  | 1-39           | 2              | QHSYITPY      | 6                   |            |       |         |
| Z-491 | 4-59           | 1-1/ 1-7/ 1-20   | 4              | ARKKSAGQPRGLDY           | 10                  | 1-39           | 1              | QOYNSYKPT     | 14                  |            |       |         |
| Z-492 | 1-8            | 3-22             | 4/5            | ARDVSRROYDSTGYYPWF       | 8                   | 3-15           | 3              | QOYNDWPPFT    | 6                   |            |       |         |
| SR-5  | V <sub>H</sub> | D                | J <sub>H</sub> | IgH-CDR3 (aa)            | V <sub>H</sub> -Mut | V <sub>K</sub> | J <sub>K</sub> | Igk-CDR3 (aa) | V <sub>K</sub> -Mut | LPS        | dsDNA | Insulin |
| Z-204 | 3-33           | nd               | 6              | ARDISLNHYYYGLDV          | 5                   | 2-14           | 3              | SSYTTNNTMM    | 2                   | R          | R     | R       |
| Z-229 | 5-51           | 7-27             | 6              | ARHTGVQGMWNSRPNRSTYYYMDI | 10                  | 2-14           | 2/3            | NSYANNIVV     | nd                  |            |       |         |
| Z-231 | 3-11           | 1-26             | 4              | ARDRIVGVSASVDY           | 4                   | 1-40           | 3              | QSFDRSPRV     | 5                   |            |       |         |
| Z-303 | 3-74           | 3-3              | 5              | ARGRGDSWGGYPPDS          | 7                   | 2-14           | 2/3            | SSYTTNTFVL    | nd                  |            |       |         |
| Z-307 | 3-9            | 4-17             | 4              | VKEDIQEDYDGIHFDH         | 8                   | 1-40           | 1              | QSYDNRLRAYV   | 4                   | R          | NR    | NR      |
| Z-309 | 5-51           | 4-17             | 5              | ARSSOITVYDS              | 13                  | 2-14           | 1              | ASLTSDDTL     | 7                   |            |       |         |
| Z-316 | 3-21           | 1-26/ 1-15/ 6-19 | 4              | TRALVRGTGWGDY            | 9                   | 2-14           | 3              | CSYTSITTPWV   | 4                   |            |       |         |
| Z-320 | 4-4            | 1-1/ 1-20        | 4              | ARESLNWNDFGNFDY          | 3                   | 2-14           | 1              | SSYSSLLFV     | 1                   | NR         | NR    | NR      |
| Z-325 | 3-43           | 4-4/ 4-11        | 6              | AKNNYESRYSFRNYHYNGLDV    | 14                  | 1-44           | 2/3            | ATWDDSLNGPV   | 5                   |            |       |         |
| Z-328 | 4-34           | 6-6/ 6-19/ 6-25  | 6              | ARGSLRIAYHYGMDV          | 8                   | 1-51           | 3              | GTWDDSLSAGV   | 5                   |            |       |         |
| Z-330 | 4-59           | 2-8              | 4              | AROVQHTGFSYLLFDY         | 7                   | 7-43           | 3              | LIYGVAVQV     | 2                   |            |       |         |
| Z-331 | 4-39           | 3-22             | 4              | ARHPVQSYPLLYFDY          | 5                   | 2-11           | 1              | CSYAGGYTFWV   | 3                   | R          | R     | R       |
| Z-342 | 3-74           | 3-3              | 6              | ARLYDFWVSGYSRVD          | 6                   | 2-8            | 1              | SSYAGSNPV     | 2                   |            |       |         |
| Z-344 | 3-11           | 3-9/ 3-16        | 4/5            | ARDLWGTGVTGTRFDI         | 13                  | 2-14           | 3              | CSYDTSARRV    | 5                   |            |       |         |
| Z-347 | 4-59           | 3-22             | 4              | ARGSYDDTSGQPRGLFDH       | 10                  | 1-40           | 1              | HSYDNTLRGSNV  | 3                   |            |       |         |
| Z-348 | 4-59           | 2-2              | 3              | ARHLPASGGDAFDI           | 3                   | 2-23           | 1              | CSYAGTSTV     | 0                   | R          | R     | R       |
| Z-349 | 1-18           | 3-16             | 6              | ARSLGFRGSYGMVD           | 4                   | 1-44           | 3              | AAWDDSLNGYVW  | 0                   |            |       |         |
| Z-362 | 1-2            | 2-8/ 3-16        | 6              | ARDKGTVMNYAMDV           | 3                   | 1-51           | 3              | GTWDDSLSAGV   | 2                   |            |       |         |
| Z-366 | 3-64           | 3-3              | 4              | AREGGRRLSGVIGKHFDFY      | 7                   | 2-23           | 3              | CSYAGPYTSWV   | 6                   |            |       |         |
| Z-370 | 3-21           | 1-26/ 2-15/ 6-19 | 4              | TRALVRGTGWGDY            | 9                   | 2-14           | 3              | CSYTSITTPWV   | 4                   |            |       |         |
| Z-378 | 3-33           | 3-22             | 3              | ARAEYDSSGYPPDAFDI        | 1                   | 2-14           | 1              | SSYTSSTLTV    | 0                   |            |       |         |
| Z-380 | 3-33           | 2-15             | 6              | ARPSTPCSLTSCNPDV         | 4                   | 2-23           | 1              | CSYAGTSTV     | 0                   |            |       |         |
| Z-416 | 4-30-2         | 6-13             | 5              | ARCHPTSRYSRSPDFD         | 4                   | 2-14           | 1              | SSYTSSTLTV    | 3                   |            |       |         |
| Z-420 | 3-11           | 5-5/ 5-18        | 4              | VRYSSSTIQIGSRNFDI        | 8                   | 2-14           | nd             | SSYTSNT       | 4                   |            |       |         |
| Z-424 | 3-33           | 4-17/ 4-23       | 4              | AREPDYLDIY               | 4                   | 4-69           | 3              | QTYWSDIHGV    | 3                   |            |       |         |
| Z-425 | 1-18           | 3-22/ 6-19       | 5              | ARNSSWDVENWVDP           | 7                   | 2-23           | 1              | YSYAGYSTV     | 6                   |            |       |         |
| Z-429 | 4-59           | 1-26             | 4              | ARRRSGLHTGSFHLDS         | 9                   | 6-57           | 3              | QSYDRTNWV     | 3                   |            |       |         |
| Z-430 | 3-23           | 6-19             | 6              | AKGVSSGWVNGMDV           | 3                   | 2-14           | 1              | SSYTSSTHYV    | 0                   |            |       |         |
| Z-436 | 4-59           | 6-13             | 4              | ARRQLATHEFDY             | 10                  | 2-23           | 3              | CSYAGGPTV     | 5                   |            |       |         |
| Z-438 | 4-49           | 4-17             | 4              | ARLTHYGDYFDY             | 13                  | 1-44           | nd             | AARDDSL       | 4                   |            |       |         |
| Z-441 | 3-20           | 2-2              | 4/5            | AKYPCRYCSSTRSGLDK        | 11                  | 1-44           | 3              | AAWDDSLNGPV   | 3                   |            |       |         |
| Z-443 | 3-23           | 3-22             | 4              | AKDFSSFMYSNDSGYCQGLDY    | 4                   | 1-40           | 3              | QSYDSSLSCSV   | 1                   |            |       |         |
| Z-445 | 3-33           | 4-23/ 5-12/ 5-24 | 4              | ARDGSYEVYD               | 10                  | 2-18           | 3              | SSFTTGGTYFRV  | 5                   |            |       |         |
| Z-447 | 4-59           | 2-2/ 3-9         | 4              | AROVQSCAGYCYVHFDY        | nd                  | 7-43           | 3              | LLYHGAQV      | 3                   |            |       |         |
| Z-449 | 4-59           | 5-24             | 3              | ARWRSDAHVFHALDV          | 11                  | 2-11           | 1              | CSYAGSYTV     | 0                   |            |       |         |
| Z-450 | 3-21           | 6-15/ 6-19       | 4/5            | ASHLSGDSGGYD             | 4                   | 4-69           | 3              | QTYWGTIIV     | 3                   |            |       |         |
| Z-454 | 3-33           | 4-17             | 6              | ARGPASTVTKPGWYHYHYGMDV   | 2                   | 1-40           | 3              | QSYDTSLSGWV   | 4                   |            |       |         |
| Z-456 | 4-59           | 5-24             | 5              | ARFRDGYDSYWFDP           | 5                   | 3-25           | nd             | QOYADSSGY     | nd                  |            |       |         |
| Z-457 | 1-2            | 1-7/ 1-20        | 5              | ARADNWNPSNWFDP           | 0                   | 2-23           | 1              | CSYAGSYRVV    | 4                   |            |       |         |
| Z-458 | 4-59           | 2-2              | 4              | AREVQSCSTNCLYHFDY        | 11                  | 7-43           | 2              | LLYSGHTQV     | 3                   |            |       |         |
| Z-466 | 1-18           | 3-3              | 4              | ARVNYDFSNGSHAPYSLDY      | 14                  | 2-14           | 3              | SSYTTSSSLE    | 4                   |            |       |         |
| Z-467 | 4-59           | 2-2              | 4              | AREVQSCSTNCLYHFDI        | 10                  | 7-43           | 2/3            | LLYSGHTQV     | 3                   |            |       |         |
| Z-477 | 3-48           | 4-17             | 4              | ARDGLGTVSPLEFDY          | 4                   | 1-44           | 1              | AAWDDSLNGV    | 5                   |            |       |         |
| Z-486 | 3-74           | 3-3              | 5              | ARGRGDSWGGYPPDS          | 10                  | 2-14           | nd             | nd            | 4                   |            |       |         |
| Z-488 | 4-39           | 3-22             | 4              | ARGTYNSDNGYPLGYFDY       | 8                   | 1-40           | nd             | nd            | nd                  |            |       |         |
| Z-494 | 3-9            | 5-12             | 4              | AKDIAGDDIVIASDY          | 6                   | 2-14           | 1              | SSYTSNTKV     | 3                   |            |       |         |

aa: amino acids; V-Mut: no. of mutations within V region; nd: not determined; R: reactive in ELISA; NR: not reactive in ELISA; clonally related antibodies are indicate in the same color

Table S5: Ig gene analysis and antibody reactivity of HCV E2 peptide (aa 483-499)-binding memory B cells from patient CHC-3.

| IG    | HEAVY CHAIN    |                |                |                             |                     | LIGHT CHAIN    |                |               |                     |
|-------|----------------|----------------|----------------|-----------------------------|---------------------|----------------|----------------|---------------|---------------------|
|       | V <sub>H</sub> | D              | J <sub>H</sub> | IgH-CDR3 (aa)               | V <sub>H</sub> -Mut | V <sub>k</sub> | J <sub>k</sub> | Igk-CDR3 (aa) | V <sub>k</sub> -Mut |
| E-019 | 3-48           | 3-9            | 4              | ARALEPDHILTYDYD             | 6                   | 3-15           | 1              | QQYNSWLT      | 2                   |
| E-021 | 4-30-4         | 3-16           | 4/5            | ASGRIGVRLGGEFLQ             | 5                   | 1-39           | 1              | QQSDIIPWT     | nd                  |
| E-040 | 3-53           | 3-16           | 4/5            | ARVGLGELSLYYT               | nd                  | 2-28           | 3              | MQALQTPQT     | 2                   |
| E-043 | 3-72           | 2-15           | 4              | IRTYGCTGGTCEPYFES           | 3                   | 1D-17          | 4              | LQHKYSPLT     | 3                   |
| E-077 | 1-69           | 3-16/2-2       | 6              | ASKPYTWIDRMVIQHYVMDV        | nd                  | 2-29           | 4              | QQDKHLRT      | nd                  |
| E-107 | 4-59           | 6-19           | 3              | AGEWAVAGSDAFDI              | nd                  | 2-30           | 5              | nd            | 6                   |
| E-206 | 3-33           | 3-3            | 3              | ARVALGGWDAFDI               | 7                   | 1-39           | 2              | QQSSSTPGYT    | 5                   |
| E-209 | 4-31           | 3-10/2-15      | 4              | ARESGDLLCSDY                | nd                  | 1-39           | 1              | QQSYSTPRT     | 3                   |
| E-211 | 5-51           | 2-21           | 6              | ARTKRDCGGDCYQYYGYMDV        | 1                   | 2-28           | 4              | MQALQTLT      | nd                  |
| E-212 | 3-15           | 2-8            | 6              | TTVGMAPPELLDCTSPPCPRYYGYMDV | 1                   | 1-39           | 2              | QQSYNNPRT     | 7                   |
| E-215 | 3-21           | 4-17           | 6              | ARANGDYVYHYHYMDV            | 6                   | 3-15           | 2              | QQYNNWPPYT    | 1                   |
| E-218 | 3-30           | 3-10           | 3              | AKAPRLHRPHYGGSRDAFHI        | 1                   | 3-20           | 1              | QQYGSLLWT     | 1                   |
| E-220 | 4-39           | 3-9/5-24/6-25  | 6              | ARESGNTISGFYYMMNV           | nd                  | 3-11           | 2              | QQSINWPPSYT   | 2                   |
| E-221 | 3-23           | 6-19/5-12      | 6              | AKDRKSGFQNYCYNNMAV          | 4                   | 3D-20          | 5              | QHCGRSPPT     | 5                   |
| E-222 | 1-69           | 2-2            | 4              | ARGVFCSTSCCLFDY             | 11                  | 3-15           | 1              | HQYNNWWT      | 3                   |
| E-237 | 3-20           | 3-10/3-16      | 6              | ARHRGYVGSQYMDV              | 9                   | 3D-15          | 3              | QQYNNGAT      | 4                   |
| E-241 | 3-15           | 4-17           | 6              | TADYGNLGFYYGYMDV            | 2                   | 3-20           | 5              | QQYGSSSQIT    | 1                   |
| E-248 | 3-30-3         | 3-16           | 6              | ARDAVPRYYDWSAYTPDYGYMDV     | 5                   | 3-20           | 2              | QQYGSPPHT     | 2                   |
| E-251 | 1-69           | 2-2/2-15/2-21  | 6              | ARDPPPGRSSNYCSYMDL          | 8                   | 3D-15          | 1              | QQYTSRT       | 1                   |
| E-255 | 5-a            | 1-26/5-12/7-27 | 4              | ARRRNSAWGSDH                | 10                  | 3-20           | 2              | HOSASSLYT     | 5                   |
| E-257 | 3-9            | 2-2/4-11       | 3              | AKDNASALPRPSDAFDG           | 4                   | 3-11           | 2              | QQRRDWPT      | 3                   |
| E-260 | 3-48           | 3-22           | 6              | ARTPYHYDSRSYNPRVGYFYGYMDV   | nd                  | 1-39           | 4              | QQSYNSPLT     | 5                   |
| E-261 | 1-18           | 2-2            | 4              | AREQGFCSTSCYRSLDF           | nd                  | 3-20           | 2              | QQYVSSYT      | 3                   |
| E-267 | 4-34           | 2-2            | 4              | ARPHYCSSTCTGPFHY            | 9                   | 3-15           | 1              | QQYNNW/PWT    | 5                   |
| E-271 | 3-30           | 3-10/3-16      | 5              | VRDQFTYAVTGRFDP             | nd                  | 1-17           | 2              | QQHNSPYT      | 6                   |
| E-272 | 3-30           | 2-2/2-15       | 5              | ARTPNCRSSCYRLVRP            | nd                  | 1-39           | 1/4            | QQSYTTPHT     | 3                   |
| E-282 | 1-69           | 2-2            | 6              | ARDRYCSGTTCCQNYHYNYMDV      | 3                   | 1-39           | 2              | QQSYNSSPV     | 5                   |
| E-284 | 3-7            | 6-19/6-13      | 4              | ARDGSRNWPYDIDY              | 6                   | 1-16           | 2              | QQYHTYPT      | 1                   |
| E-290 | 1-69           | 6-6            | 6              | ARDPPPGRSSNYCSYMDL          | 6                   | 3D-15          | 1              | QQYHSRT       | 1                   |
| E-295 | 1-18           | 6-19           | 3              | ARERDSSGWRSLAFDI            | nd                  | 3-11           | 5              | QQRSFWPPT     | 2                   |
| E-318 | 4-4            | 3-10           | 4              | ARDSLEGTDFD                 | nd                  | 2-28           | 1              | KQPIGTQ       | nd                  |
| E-323 | 5-51           | 2-2            | 3              | AAAIWVPAIPDAFDI             | 0                   | 1-17           | 4              | LQHNYSYPH     | 0                   |
| E-331 | 1-69           | 2-2            | 4              | ARRADCCSPSCPYNY             | 5                   | 3-20           | 2              | QQYGSPPYT     | 1                   |
| E-334 | 4-39           | 3-3/3-22       | 6              | ARERISSTVFVVYDYYMMNV        | 5                   | 2-28           | 1              | MQALQTPRT     | 0                   |
| E-412 | 3-9            | 4-23           | 6              | AKDLLRTVDNNYYGMDV           | 7                   | 1D-33          | 3              | nd            | 3                   |
| E-415 | 1-2            | 1-26           | 5              | ARVGVGALP                   | 3                   | 3-20           | 1              | QQYGNSPGT     | 0                   |
| E-416 | 3-21           | 2-2            | 6              | VRETTSYCRSTSCRGNYYMDV       | 3                   | 2-28           | 5              | VQALQTPLT     | 2                   |
| E-420 | 4-61           | 3-3            | 5              | ARSPLYDFWSPRGGFDP           | nd                  | 1D-17          | 4              | LQHNYSY       | nd                  |
| E-421 | 1-18           | 3-3            | 6              | ARIFGVIPVPIYYMDV            | nd                  | 1-39           | 2              | QQTFSSPYT     | 5                   |
| E-423 | 4-31           | 3-10/6-6/6-19  | 5              | ATSIAPRGGNFDDP              | nd                  | 1-12           | 4              | QQANSFPLT     | 3                   |
| E-424 | 3-9            | 5-5/5-18       | 5              | ARGYSYVYNWLDP               | 6                   | 2-30           | 1              | MQATHWWT      | 2                   |
| E-429 | 5-51           | 1-26           | 3              | ARREGLVLPDGPDTFDI           | 10                  | 1-6            | 2              | LQDFNFPPT     | 7                   |
| E-431 | 1-69           | 2-2            | 6              | AVGGSSGVYCRSSSRLTTPHYFYMDV  | 2                   | 1-39           | 5              | QQRYSTPIT     | 3                   |
| E-432 | 4-61           | 3-3            | 6              | AREHGSWYGVDFYNGVDV          | nd                  | 3-20           | 1              | QQHSSLPDT     | 4                   |
| E-435 | 1-8            | 6-19           | 6              | ARGGSGWYDI                  | 6                   | 1-5            | 1              | QQFNSPRT      | 3                   |
| E-516 | 3-66           | 3-10           | 6              | AKESAMVRGVYGYGYMDV          | 3                   | 1-39           | 2              | QQSYNTPRT     | 7                   |
| E-520 | 3-30-3         | 3-3            | 5              | ARPDYHFVWNYWFDP             | 6                   | 3-15           | 1              | QQYHNWPLT     | 2                   |
| E-522 | 4-31           | 2-21/3-10/6-19 | 5              | AGDKGIAEGIDP                | nd                  | 1-17           | 3              | LQHNYSYPT     | 3                   |
| E-523 | 3-23           | 3-22           | 3              | AKNRTLILVDFRCFDI            | nd                  | 1-37           | 5              | QRTYNAPR      | nd                  |
| E-524 | 3-74           | 2-2            | 6              | ARSGPAALDV                  | 7                   | 3-20           | 4              | QQYGSNPLT     | 5                   |
| E-525 | 3-21           | 5-12           | 2              | ARKRGKGGHDYGNWYFDL          | 8                   | 1-39           | 3              | QQSYSPLRT     | 8                   |
| E-526 | 1-8            | 6-19           | 4              | ARGRNSGWSYNFDN              | 6                   | 1-33           | 3              | QHYDHWPSIFT   | 4                   |
| E-529 | 3-30-3         | 2-2            | 3              | ARDRNWVPAAPDAFNI            | 3                   | 1-39           | 4              | QQSYTTPLT     | 3                   |
| E-530 | 1-2            | 6-19           | 4/5            | AKDKVYGINLADF               | 10                  | 4-1            | 2              | QQYFRPPPT     | nd                  |
| E-532 | 4-39           | 6-19           | 6              | ARNSQWLFCFGGMNV             | nd                  | 1-9            | 3              | QQILDNPFT     | 3                   |
| E-533 | 1-2            | 2-2            | 4              | ARGQMVPAILPY                | 2                   | 3-20           | 2              | QHYGNSPNT     | 3                   |
| E-536 | 4-59           | 2-15/3-22      | 6              | ARVYSPGSEGNFYGYMDV          | 6                   | 1-39           | 1              | QQSYSLPRT     | 6                   |
| E-540 | 1-2            | 2-15           | 5              | VRGYCSDTTCVIGGALDP          | 10                  | 2-28           | 3              | LQALQTPRT     | 3                   |
| E-543 | 3-23           | 3-3            | 4              | ATHGVVLPSDY                 | nd                  | 3-15           | 1              | HQYHDWPLT     | 2                   |
| E-545 | 1-18           | 6-13/6-19      | 4              | AREFTGTWYFLDY               | 7                   | 1-39           | 4              | QQSYSAPTH     | 5                   |
| E-546 | 3-30           | 2-21/2-8       | 6              | ASPGGGRTYDYGMDV             | 7                   | 2-28           | 2              | MQALQTPVT     | 2                   |
| E-548 | 4-34           | 2-2            | 3              | ARRPIVIPARKRGAFDI           | nd                  | 1-39           | 1              | QQSYFRT       | 3                   |
| E-549 | 4-39           | 3-3            | 6              | ARTADFWSHGVIVPHSEYMDV       | nd                  | 4-1            | 4              | QQYHSAPLS     | 8                   |
| E-550 | 3-53           | 3-16           | 4              | ARGKPYDYWGGFDY              | 2                   | 1D-16          | 4              | QQSYSPRS      | nd                  |
| E-551 | 3-30           | 3-16           | 4/5            | AKDRLGSAEGLIWPDN            | 6                   | 2-28           | 5              | MQGLQTPIT     | 3                   |
| CHC-3 | V <sub>H</sub> | D              | J <sub>H</sub> | IgH-CDR3 (aa)               | V <sub>H</sub> -Mut | V <sub>k</sub> | J <sub>k</sub> | Igk-CDR3 (aa) | V <sub>k</sub> -Mut |
| E-014 | 4-39           | 1-14           | 4              | VTANQQY                     | 16                  | 3-21           | 1              | QVWDSGSAHYV   | nd                  |
| E-029 | 4-39           | 3-3            | 4              | ARHGKALRYLEGSYPFDY          | 6                   | 2-23           | 2/3            | CSHAGSTPLRHVI | 2                   |
| E-038 | 3-23           | 3-10           | 4              | AKNTYTTFTSGFDC              | nd                  | 2-8            | 3              | SSYAGNNIV     | 3                   |
| E-054 | 1-69           | 6-19           | 6              | ARDTVAVPHNYGYMDV            | 4                   | 7-46           | 2/3            | LLSYTGGRV     | 5                   |
| E-085 | 4-39           | 5-24/6-6       | 4              | GRGWPSAFY                   | nd                  | 3-1            | 1              | QAWDTNSYV     | 5                   |
| E-086 | 1-18           | 2-15           | 4              | ARERGAVVVTTTFDS             | 6                   | 1-40           | 1              | QSYDSSLRGGV   | nd                  |
| E-108 | 3-23           | 6-13           | 6              | ANEQQLVTAYGMDV              | 7                   | 1-51           | 1              | GTWDSLRAGV    | 1                   |
| E-111 | 4-39           | 3-10           | 6              | VSARGSVYYGYMDV              | 8                   | 1-44           | 2/3            | AAWDDSLNGYVL  | 2                   |
| E-121 | 3-23           | 3-16           | 4              | AKDRGGLISKFDY               | 6                   | 2-8            | 2/3            | TSYAGITNVV    | 2                   |
| E-127 | 3-9            | 1-26/3-16/7-27 | 4              | AKDSGGNGALHPDF              | 5                   | 4-69           | 2/3            | QTWGTGVRVL    | 5                   |
| E-214 | 1-18           | 2-2/2-15       | 4              | ARSDIWA/VPTGIYSDYFDY        | nd                  | 1-51           | 2/3            | GTWDSLSVVV    | 3                   |
| E-223 | 3-53           | 6-19           | 6              | ARHQSSGWYGDGMVDV            | 7                   | 1-40           | 1              | QSYDSSLRGGV   | 4                   |
| E-247 | 4-59           | 3-3/3-16       | 4              | ARMGVVWSSFLLELYFDL          | nd                  | 1-36           | 2/3            | ATWDDSVNGPV   | 2                   |
| E-343 | 5-a            | 5-12           | 4              | ARQNGAYDSGFY                | 3                   | 3-21           | 3              | QVWDSSTDHGV   | 0                   |

aa: amino acids; V-Mut: no. of mutations within V region; nd: not determined

Table S6: Ig gene analysis and antibody reactivity of HCV E2 peptide (aa 483-499)-binding memory B cells from patient CHC-6.

| IG    |                | HEAVY CHAIN      |                |                           |                     |                | LIGHT CHAIN    |               |                     |  |
|-------|----------------|------------------|----------------|---------------------------|---------------------|----------------|----------------|---------------|---------------------|--|
| CHC-6 | V <sub>H</sub> | D                | J <sub>H</sub> | IgH-CDR3 (aa)             | V <sub>H</sub> -Mut | V <sub>κ</sub> | J <sub>κ</sub> | Igκ-CDR3 (aa) | V <sub>κ</sub> -Mut |  |
| B-004 | 1-46           | nd               | 3              | VREGAREAFDV               | 9                   | 3-11           | 5              | QQRINWPT      | 3                   |  |
| B-006 | 3-48           | 3-10             | 4/5            | AFMSHNFRGGFSDV            | 6                   | 3-20           | 2              | QQYGSAPPYT    | 5                   |  |
| B-008 | 1-46           | 2-2/ 2-15        | 4              | ARDLHRSEYCSDDGCYPIDY      | 6                   | 1-5            | 2              | QQYDTYLYT     | 2                   |  |
| B-011 | 4-34           | 3-3/ 6-19        | 3              | TRGRSREWPTSDI             | 13                  | 3-20           | 1              | QYYGSPRPT     | 7                   |  |
| B-023 | 4-61           | 3-16             | 6              | ARESAGEGTPSGYGLDV         | 8                   | 1-39           | 3              | QQSYSTPQIT    | 6                   |  |
| B-024 | 1-18           | 2-21/ 3-3        | 4              | ARDSDNWIHYFDY             | 5                   | 1-39           | 2              | QQYSSSPRT     | 3                   |  |
| B-028 | 3-23           | 2-2              | 6              | AKDKSATYHFYNGMDV          | 8                   | 3-11           | 4              | QQRSNWPLT     | 2                   |  |
| B-030 | 1-2            | 2-8/ 4-4/ 4-11   | 4              | ARLNGDYTHFDY              | 8                   | 2-28           | 4              | MQALQTPHA     | 3                   |  |
| B-031 | 4-59           | 3-9/ 3-16/ 6-13  | 6              | ATTSWATDAFET              | 8                   | 3-20           | 4              | QQYSSSPLT     | 5                   |  |
| B-043 | 3-21           | 3-22             | 4              | ArEDSSGYSYFSDY            | 5                   | 3-20           | 1              | QQFDGSRWT     | 1                   |  |
| B-051 | 3-9            | 2-6              | 5              | AKDIRTRLGVCAGGICYNWFDP    | 5                   | 3-15           | 2              | QQYNNWPTY     | 1                   |  |
| B-052 | 1-2            | 2-2/ 2-8/ 6-25   | 1/ 4/ 5        | VTIPSARKDFRGY             | 16                  | 1-9            | 5              | VQLGRYPIT     | 10                  |  |
| B-058 | 3-21           | 1-26             | 4              | ARENSGTYHQADY             | 11                  | 1-39           | 1              | QQSLRTPRT     | 3                   |  |
| B-064 | 4-4            | 3-22             | 6              | ARSYYDDSSGYSSHYYYYYMDV    | 5                   | 1-39           | 2              | QQYSYYPYT     | 3                   |  |
| B-065 | 4-59           | 2-21/ 3-3/ 7-27  | 3              | ARATQASSNAFDI             | 11                  | 3-20           | 1              | QHYGSSSWT     | 4                   |  |
| B-069 | 4-4            | 2-21             | 5              | AKPGAYCGGDCYDEGG          | 7                   | 3-11           | 4              | QQRSDWPPKFT   | 0                   |  |
| B-071 | 4-59           | 3-10/ 3-16/ 4-17 | 3              | ATTGGLLTPDGSYLEGAFDV      | 9                   | 1D-33          | 4              | QHYDNLPTV     | 5                   |  |
| B-073 | 3-66           | 6-19             | 5              | ARDLAVAGTGNWFDP           | 7                   | 3-20           | 1              | QQFRT         | 2                   |  |
| B-074 | 4-39           | 3-16             | 4              | ATPVYDYVWGRSRPPRYFEY      | 9                   | 3D-15          | 4              | QQYNNWSPLT    | 3                   |  |
| B-078 | 3-43           | 6-13             | 4              | ARDIPHISISWFYLDL          | 8                   | 3-11           | 4              | QHRTNWPLT     | 3                   |  |
| B-079 | 3-48           | 3-3              | 4/5            | ARESTIFGGADH              | 3                   | 3-11           | 5              | QQRSNWPRIT    | 0                   |  |
| B-084 | 5-51           | 3-16/ 5-12       | 1/ 4/ 5        | ARHNLKGLLEH               | 7                   | 1-5            | 1              | QQYNSYRST     | 3                   |  |
| B-090 | 3-23           | 4-4/ 4-11/ 6-13  | 4              | AKDADYSSPYFDD             | 9                   | 3-20           | 1              | HOYGSST       | 4                   |  |
| B-092 | 1-69           | 3-22             | 3              | ARAADYYSRSGWVALDI         | 8                   | 3-15           | 2              | QQYNNWPPYT    | 2                   |  |
| B-103 | 1-2            | 1-1/ 3-16        | 6              | ATTLQRFTVLDGMDV           | 2                   | 1-39           | 3              | QQYSSPAT      | 4                   |  |
| B-105 | 3-23           | 1-26/ 3-16/ 5-12 | 4              | ARDLEYSADYLDGIYFDS        | 6                   | 1-9            | 1              | HQLNSYPRT     | 0                   |  |
| B-106 | 3-30-3         | 6-13             | 4              | ARDLKGYPYSTWYTMIFDY       | 3                   | 3-11           | 2              | QQRSNWPTY     | 3                   |  |
| B-107 | 3-7            | 3-3/ 3-22        | 4/5            | ATMDTIFYDSVGYEVLDH        | 6                   | 1-9            | 4              | QQLNSVPPT     | 3                   |  |
| B-108 | 4-4            | 6-19             | 4              | TSQYSSGIWHDY              | 9                   | 4-1            | 2              | QQYRSAPOT     | 3                   |  |
| B-110 | 3-9            | 2-2/ 2-15/ 2-21  | 3              | AKDTEILPNALVAFDN          | nd                  | 3-11           | 4              | QQRSNWPLT     | 1                   |  |
| B-117 | 3-30           | 2-15/ 6-19       | 6              | ARAGGPISYFITSSTTI         | 11                  | 1-39           | 3              | QQSYSSPFT     | 5                   |  |
| B-128 | 3-23           | 6-19/ 6-13       | 4              | AKETSTWYYPIDY             | 5                   | 1-6            | 3              | LQDYDYPFT     | 3                   |  |
| B-129 | 3-49           | 1-1/ 1-7/ 3-3    | 4              | SRASTDGLDY                | 7                   | 4-1            | 1              | QQYDTPWWT     | 3                   |  |
| B-130 | 3-66           | 2-15/ 3-16       | 4/5            | ANGGHSAY                  | 8                   | 4-1            | 1              | HQYITAPVT     | 2                   |  |
| CHC-6 | V <sub>H</sub> | D                | J <sub>H</sub> | IgH-CDR3 (aa)             | V <sub>H</sub> -Mut | V <sub>λ</sub> | J <sub>λ</sub> | Igλ-CDR3 (aa) | V <sub>λ</sub> -Mut |  |
| B-005 | 4-59           | 3-22             | 3              | ARARPLNYYDNSGVDAFDI       | 4                   | 1-40           | 1              | QSYDSSLASVY   | 2                   |  |
| B-007 | 3-23           | 3-10/ 3-16       | 4              | AKVVDNHGNSNFFDH           | 7                   | 2-14           | 2/3            | SSYTSISTVI    | 2                   |  |
| B-010 | 1-69           | 3-3/ 3-9/ 3-16   | 3              | TKDLHHRGQADYDGFVDV        | 14                  | 1-40           | 3              | QSFDSRLRGPV   | 5                   |  |
| B-018 | 3-74           | 3-16             | 4              | VRLSLGVGVANDY             | 6                   | 1-47           | 1              | AAWDDSLSGSYV  | 1                   |  |
| B-026 | 4-39           | 3-10             | 6              | ARREVGYSYGNVHMDV          | 4                   | 2-23           | 3              | CSYANSTTWW    | 3                   |  |
| B-034 | 3-21           | 4-17/ 4-23       | 3/6            | ARGMSTVYGVVHSGDI          | 6                   | 2-14           | 2/3            | SSYTTSTLTV    | 4                   |  |
| B-047 | 3-66           | 3-22             | 4              | ARGAYYDGPYQLEAFYFDY       | nd                  | 1-40           | 1              | QSYDSSLNAFV   | 4                   |  |
| B-049 | 3-23           | 4-17/ 4-23       | 2              | AKDDYGTVDGVGVYFDL         | 9                   | 3-1            | 2/3            | QAWDSGTVI     | 4                   |  |
| B-060 | 3-74           | 5-24             | 4              | ARGWLPLDY                 | 4                   | 1-44           | 3              | AAWDDSLNGWA   | 3                   |  |
| B-067 | 3-15           | 3-16             | 6              | MTDIGMEEFRGAIDTSRYSSYYMDV | 7                   | 4-69           | 3              | QTWGTGIV      | 2                   |  |
| B-077 | 3-33           | 3-3              | 4              | ARDKTFWGFHDH              | 9                   | 2-8            | 1              | SSYVGGNFYV    | 3                   |  |
| B-088 | 4-34           | 2-21/ 3-9/ 6-19  | 4              | ARGVVDVAVTGLIAPYFFDY      | 8                   | 1-40           | 2/3            | QSYDRSLSVV    | 7                   |  |
| B-089 | 3-7            | 3-16             | 4/5            | AKEHWGPTSP                | 6                   | 2-8            | 1              | FSYAGSSYV     | 2                   |  |
| B-091 | 1-2            | 3-10             | 6              | ARDARFRELSGFIMDV          | 3                   | 2-14           | 2/3            | SSYTSSTTVV    | 5                   |  |
| B-094 | 3-30           | 4-17/ 4-23       | 2              | ARLIDYGNLTVTSNYDV         | 13                  | 3-27           | 1              | YSATDYTV      | 5                   |  |
| B-095 | 3-23           | 3-10             | 6              | AKLDGPTMQGVINYYAMDV       | 2                   | 3-25           |                | QSADSSDTY     | 2                   |  |
| B-102 | 3-30-3         | 5-5/ 5-18        | 6              | VTGRTAHYVYGMVDV           | 6                   | 2-14           | 3              | CSYTTISTWW    | 2                   |  |
| B-121 | 3-21           | 3-22/ 3-3        | 5              | ARRVPRLWSRFDS             | 7                   | 1-40           | 2/3            | QSYDTTHVI     | 3                   |  |
| B-127 | 4-28           | 3-10             | 4              | AGGLWFGSFDY               | 7                   | 2-11           | 2/3            | CSYAGTFRDVV   | 3                   |  |

aa: amino acids; V-Mut: no. of mutations within V region; nd: not determined

Table S7: Ig gene analysis and antibody reactivity of HCV E2 peptide (aa 483-499)-binding memory B cells from patient CHC-8.

| IG           | HEAVY CHAIN    |                  |                |                        |                     | LIGHT CHAIN    |                |               |                     |  |
|--------------|----------------|------------------|----------------|------------------------|---------------------|----------------|----------------|---------------|---------------------|--|
|              | V <sub>H</sub> | D                | J <sub>H</sub> | IgH-CDR3 (aa)          | V <sub>H</sub> -Mut | V <sub>K</sub> | J <sub>K</sub> | Igκ-CDR3 (aa) | V <sub>K</sub> -Mut |  |
| <b>CHC-8</b> |                |                  |                |                        |                     |                |                |               |                     |  |
| S-007        | 5-51           | 2-21/ 6-25       | 4              | ARRRAAPAYYLD           | 4                   | 1-27           | 4              | QKYNASPLT     | 2                   |  |
| S-011        | 4-b            | 3-3              | 4              | ARVEGTRTIFGVMDY        | 7                   | 1-5            | 1              | QQYNSYPWT     | 2                   |  |
| S-013        | 3-72           | 4-17             | 4              | ARLAYGDYFFDY           | 2                   | 1-16           | 4              | QQYNSYPLT     | 1                   |  |
| S-016        | 3-9            | 2-21             | 6              | AKDIDCSGGCCYSNFYGMDV   | 4                   | 2D-29          | 4              | MQTIQLPLT     | 9                   |  |
| S-017        | 4-30-4         | 2-2              | 3              | ARDGYCSSSTCYLRDVFDI    | 6                   | 1D-33          | 1              | QQFDDLPR      | 3                   |  |
| S-021        | 4-39           | 6-19             | 4              | AKPRDDYSGWYPPFDH       | 7                   | 1-5            | 4              | QQYKSNPEIT    | 2                   |  |
| S-022        | 4-61           | 1-7              | 5              | CREGYPIGILVELLSIF      | nd                  | 1-39           | 1              | QQYSNPR       | 7                   |  |
| S-027        | 3-21           | 2-2/ 2-15        | 6              | VRDRDVLPGANFYAMDV      | 8                   | 1-5            | 1              | QQYNSYRRT     | 3                   |  |
| S-028        | 5-51           | 5-12             | 4              | ARRMDSGYDPQQYFDY       | 6                   | 1-39           | 2              | QQYSNRNT      | 6                   |  |
| S-138        | 3-30           | 3-22             | 4              | AKGNYYYDSSGYGDDY       | 2                   | 4-1            | 4              | QQYYSTPLT     | 0                   |  |
| S-141        | 3-7            | 2-2              | 4/ 5           | ARENRRGIPVSI           | nd                  | 2-30           | 2              | MQATQWPFT     | 4                   |  |
| S-146        | 1-18           | 4-4/ 4-11/ 4-17  | 6              | VRDRHEVYGNYGDDYMDV     | 5                   | 1D-17          | 2              | LQHNSYPYT     | 1                   |  |
| S-152        | 3-48           | 1-7/ 4-11        | 4/ 5           | ATRKNKITY              | 9                   | 1-39           | 1              | QQIYTTWT      | nd                  |  |
| S-154        | 1-69           | 3-3              | 6              | AAHHESTRYLFAGAGNYYMDV  | 8                   | 1-5            | 1              | QQYKTMGT      | 3                   |  |
| S-155        | 3-30           | 4-11/ 4-17/ 4-23 | 4              | ARNIDVVGDFD            | 11                  | 1-5            | 1              | QQYSTYST      | 5                   |  |
| S-158        | 1-3            | 2-15/ 2-21/ 7-27 | 4/ 5           | ARDWWGSYDC             | 10                  | 3-15           | 2              | QQYQRNT       | 0                   |  |
| S-159        | 1-69           | 3-3              | 3              | ARTYNFWSGYTYAFDI       | 7                   | 2-28           | 4              | MQTLQSLT      | 0                   |  |
| S-165        | 3-23           | 7-27             | 4/ 5           | AERGWNWGPFFHN          | 8                   | 3-15           | 4              | QQHSDWFLT     | 3                   |  |
| S-176        | 4-59           | 2-15/ 2-21       | 6              | ARQKEVVEGYYHYHGMDV     | 10                  | 1-39           | 5              | QQNYSIT       | 5                   |  |
| S-188        | 3-74           | 3-9/ 5-5/ 6-13   | 4              | ARDLSWLLFDY            | 8                   | 2D-29          | 1              | MQSIQFPWT     | 4                   |  |
| S-190        | 3-21           | 3-16             | 3              | ARDLGGRRRLRSDFDF       | 7                   | 2-40           | 4              | MORIEFLT      | 1                   |  |
| <b>CHC-8</b> |                |                  |                |                        |                     |                |                |               |                     |  |
| S-004        | 5-51           | 3-3/ 5-12        | 5              | ARRVDVVMFMFGDNWFDS     | 10                  | 1-40           | 2/ 3           | QSYDTSLSASL   | 5                   |  |
| S-005        | 4-39           | 2-2              | 4              | TRLSSACATSCYDGYFDD     | 7                   | 1-51           | 2/ 3           | GTWDSRLSTVV   | 3                   |  |
| S-010        | 3-7            | 3-10/ 3-16       | 4/ 5           | ASYHGGFFSPY            | 9                   | 2-14           | 1              | CSYSSSTYV     | 4                   |  |
| S-018        | 4-b            | 1-26/ 3-3        | 4/ 5           | ARTGVGARVQFDS          | 11                  | 2-14           | 2/ 3           | LSYTLNNTLV    | 5                   |  |
| S-142        | 4-4            | 2-2              | 5              | nd                     | 9                   | 6-57           | 2/ 3           | QSYDNNINLV    | 8                   |  |
| S-153        | 7-4-1          | 3-9              | 4/ 5           | ARDRYDFYFGS            | 7                   | 1-36           | 1              | STWDYSLSAPYV  | nd                  |  |
| S-177        | 1-69           | 3-3/ 3-16        | 6              | ARGDRDRFTWFGNYYNMDV    | 6                   | 2-23           | 2/ 3           | CSYAGGPV      | 2                   |  |
| S-183        | 3-23           | 4-17             | 3              | GRDPNGDYLGAFD          | 9                   | 3-1            | 2/ 3           | QAWDSSTVV     | 0                   |  |
| S-191        | 3-23           | 3-22             | 4/ 5/ 6        | AKGANYYDNGGYLN         | 7                   | 1-47           | 2/ 3           | ATWDDSLSGVV   | 9                   |  |
| S-194        | 1-3            | 3-3/ 3-9/ 6-13   | 1/ 4/ 5        | VRDRRAGKDFEH           | 11                  | 2-14           | 1              | CSYTFSSARV    | 5                   |  |
| S-415        | 4-b            | 1-7/ 1-26/ 6-19  | 5              | ARIIGIWGNWFD           | 5                   | 2-23           | 2/ 3           | CSYVGSRRV     | 4                   |  |
| S-437        | 1-69           | 3-10             | 4              | ARTRAGIPFGSGSYKQYFFDY  | 7                   | 2-14           | 1              | CSYATSSFEV    | 3                   |  |
| S-447        | 7-4-1          | 6-19             | 4/ 5/ 6        | ARAPYSYSSGWLYN         | 3                   | 2-11           | 1              | CSYAGSYV      | nd                  |  |
| S-493        | 4-34           | 6-6              | 4              | AREGPLFQPRIAARRRPKYFDY | 11                  | 1-40           | 2/ 3           | QSYDSSSLTGYMV | 4                   |  |

aa: amino acids; V-Mut: no. of mutations within V region; nd: not determined
